# Supplementary material
Source: PubMed Central journal article supplement (PMC5986983)
Supplement: mmc1.pdf [file mmc1.pdf]

**The American Journal of Human Genetics, Volume 102**

**Supplemental Data**

**FUN-LDA: A Latent Dirichlet Allocation Model  
for Predicting Tissue-Specific Functional Effects  
of Noncoding Variation: Methods and Applications**

**Daniel Backenroth, Zihuai He, Krzysztof Kiryluk, Valentina Boeva, Lynn Pethukova, Ekta Khurana, Angela Christiano, Joseph D. Buxbaum, and Iuliana Ionita-Laza**

## SUPPLEMENTAL MATERIAL

### Summary of results for six SNPs in the literature, with evidence of regulatory function.

- rs12350739 has been shown to influence human skin color by regulating transcription of nearby *BNC2* pigmentation gene<sup>1</sup>. In Figure S10 we show the predictions for Roadmap tissue E059: Foreskin Melanocyte Primary Cells skin01, the tissue we deemed closest to the one used in the functional study, melanocyte cell lines.
- rs12740374: In<sup>2</sup> the authors show using human-derived hepatocytes that SNP rs12740374 creates a C/EBP (CCAAT/enhancer binding protein) transcription factor binding site and alters the hepatic expression of the *SORT1* gene. In Figure S11 we show the predictions for Roadmap tissue E066: Liver, the tissue we deemed closest to the one used in the functional study, human-derived hepatocytes.
- rs356168: In<sup>3</sup>, the authors performed allele-specific TaqMan<sup>®</sup> qRT-PCR analysis in human induced pluripotent stem cells (hiPSC)-derived neurons and show that this SNP regulates the expression of the *SNCA* gene, a gene implicated in the pathogenesis of Parkinson's disease. In Figure S12 we show the predictions for Roadmap tissue E007: H1 Derived Neuronal Progenitor Cultured Cells, the tissue we deemed closest to the one used in the functional study, hiPSC-derived neurons.
- rs2473307: In<sup>4</sup>, the authors showed evidence that this SNP, associated with schizophrenia, reduces expression of *CDC42* gene in a human neuronal cell line. In Figure S13 we show the predictions for Roadmap tissue E007, H1 Derived Neuronal Progenitor Cultured Cells.
- rs227727: In<sup>5</sup>, the authors show that this SNP, in perfect LD with the most significant GWAS variant, alters the function of an enhancer. In Figure S14, we show the predictions for Roadmap tissue E119, HMEC Mammary Epithelial Primary Cells.
- rs144361550: In<sup>6</sup>, the authors show that this SNP, in strong LD with a lead GWAS variant, displays allele-specific transcriptional activity in primary melanocytes. Furthermore, mass spectrometry analyses using melanoma cell line revealed that RECQL is an unequivocal allele-preferential binder of rs144361550. In Figure S15, we show the predictions for Roadmap tissue E059: Foreskin Melanocyte Primary Cells skin01, the tissue we deemed closest to the one used in the functional study, melanocyte cell lines.

**Inference and parameter estimation in the variational inference procedure.** It can be shown that for a single tissue the lower bound on the log likelihood can be written as

$$\begin{aligned}
L(\mathbf{a}, \mathbf{w}|\boldsymbol{\alpha}) &= \log \Gamma(\alpha_0 + \alpha_1) - \log \Gamma(\alpha_0) - \log \Gamma(\alpha_1) + (\alpha_0 - 1)(\Psi(a_0) - \Psi(a_0 + a_1)) \\
&\quad + (\alpha_1 - 1)(\Psi(a_1) - \Psi(a_0 + a_1)) + \sum_{i=1}^m w_i(\Psi(a_1) - \Psi(a_0 + a_1)) \\
&\quad + (m - \sum_{i=1}^m w_i)(\Psi(a_0) - \Psi(a_0 + a_1)) + \sum_{i=1}^m (1 - w_i) \log f_0(\mathbf{Z}_i) + \sum_{i=1}^m w_i \log f_1(\mathbf{Z}_i) \\
&\quad - \log \Gamma(a_0 + a_1) + \log \Gamma(a_0) + \log \Gamma(a_1) - (a_0 - 1)(\Psi(a_0) - \Psi(a_0 + a_1)) \\
&\quad - (a_1 - 1)(\Psi(a_1) - \Psi(a_0 + a_1)) - \sum_{i=1}^m w_i \log w_i - \sum_{i=1}^m (1 - w_i) \log(1 - w_i),
\end{aligned}$$

where  $\Psi(x) = d \log \Gamma(x) / dx$ .

Maximizing  $L(\mathbf{a}, \mathbf{w}|\boldsymbol{\alpha})$  with respect to  $\mathbf{a}$  and  $\mathbf{w}$ , respectively, we get

$$w_i = \frac{f_1(\mathbf{Z}_i) \times \exp(\Psi(a_1))}{f_0(\mathbf{Z}_i) \times \exp(\Psi(a_0)) + f_1(\mathbf{Z}_i) \times \exp(\Psi(a_1))},$$

and

$$a_1 = \alpha_1 + \sum_{i=1}^m w_i \quad \text{and} \quad a_0 = \alpha_0 + \sum_{i=1}^m (1 - w_i).$$

Given the optimal estimates of  $\mathbf{a}$  and  $\mathbf{w}$ , we maximize the lower bound  $L(\mathbf{a}, \mathbf{w}|\boldsymbol{\alpha})$  with respect to the hyperparameter  $\boldsymbol{\alpha}$  by using the Newton-Raphson method as in<sup>7</sup>. Namely, we update  $\boldsymbol{\alpha}$  by iterating:

$$\boldsymbol{\alpha}^{\text{new}} = \boldsymbol{\alpha} - H(\boldsymbol{\alpha})^{-1} \nabla L(\boldsymbol{\alpha}).$$

where the gradient  $\nabla L(\boldsymbol{\alpha})$  is:

$$\frac{\partial L(\boldsymbol{\alpha})}{\partial \alpha_r} = \Psi(\alpha_0 + \alpha_1) - \Psi(\alpha_r) + \Psi(a_r) - \Psi(a_0 + a_1) \quad \text{for } r = 0, 1,$$

and for the Hessian matrix we have:

$$H(\boldsymbol{\alpha}) = -\text{Diag}(\Psi'(\alpha_0), \Psi'(\alpha_1)) + \Psi'(\alpha_0 + \alpha_1) \mathbf{1}\mathbf{1}'.$$

## REFERENCES

- [1] Visser M, Palstra RJ, Kayser M (2014) Human skin color is influenced by an intergenic dna polymorphism regulating transcription of the nearby *bnc2* pigmentation gene. *Hum Mol Genet* 23: 5750–5562.
- [2] Musunuru K et al. (2010) From noncoding variant to phenotype via SORT1 at the 1p13 cholesterol locus. *Nature* 466: 714–719.
- [3] Soldner F et al. (2016) Parkinson-associated risk variant in distal enhancer of ?-synuclein modulates target gene expression. *Nature* 533: 95–99.

- [4] Gilks WP, Hill M, Gill M, Donohoe G, Corvin AP, Morris DW (2012) Functional investigation of a schizophrenia gwas signal at the *cdc42* gene. *World J Biol Psychiatry* 13: 550–554.
- [5] Leslie EJ et al. (2015) Identification of functional variants for cleft lip with or without cleft palate in or near *PAX7*, *FGFR2*, and *NOG* by targeted sequencing of GWAS loci. *Am J Hum Genet* 96: 397–411.
- [6] Choi J et al. (2017) A common intronic variant of *PARP1* confers melanoma risk and mediates melanocyte growth via regulation of *MITF*. *Nat Genet* Epub ahead of print
- [7] Blei DM, Ng AY, Jordan MI (2003) Latent Dirichlet Allocation. *Journal of Machine Learning Research* 3: 993–1022.
- [8] Tewhey R et al. (2016) Direct identification of hundreds of expression-modulating variants using a multiplexed reporter assay. *Cell* 165: 1519–1529.
- [9] Kheradpour P, Ernst J, Melnikov A, Rogov P, Wang L, Zhang X, Alston J, Mikkelsen TS, Kellis M (2013) Systematic dissection of regulatory motifs in 2000 predicted human enhancers using a massively parallel reporter assay. *Genome Res* 23: 800–811.
- [10] Lu Q, Powles RL, Wang Q, He BJ, Zhao H (2016) Integrative Tissue-Specific Functional Annotations in the Human Genome Provide Novel Insights on Many Complex Traits and Improve Signal Prioritization in Genome Wide Association Studies. *PLoS Genet* 12: e1005947.
- [11] Libbrecht MW, Rodriguez O, Weng Z, Hoffman M, Bilmes JA, Noble WS (2017) A unified encyclopedia of human functional DNA elements through fully automated annotation of 164 human cell types. doi: <https://doi.org/10.1101/086025>
- [12] Zhang Y, Hardison RC (2017) Accurate and Reproducible Functional Maps in 127 Human Cell Types via 2D Genome Segmentation. *BioRxiv preprint* doi: <http://dx.doi.org/10.1101/118752>.
- [13] Pennacchio LA et al. (2006) In vivo enhancer analysis of human conserved non-coding sequences. *Nature* 444: 499–502.
- [14] Degner JF et al. (2012) DNase I sensitivity QTLs are a major determinant of human expression variation. *Nature* 482: 390–394.

| H3K27ac-V | H3K4me1-V | H3K4me3-V | H3K9ac-V | DNase | Size   | Annotation      |
|-----------|-----------|-----------|----------|-------|--------|-----------------|
| 25.27     | 4.05      | 36.78     | 17.38    | 25.00 | 0.40%  | ActivePromoters |
| 2.99      | 2.80      | 1.02      | 0.93     | 4.33  | 1.59%  | ActiveEnhancers |
| 1.15      | 1.59      | 0.46      | 0.57     | 1.32  | 1.67%  | WeakEnhancers   |
| 0.56      | 0.94      | 0.29      | 0.43     | 0.71  | 3.50%  | NotFunctional   |
| 0.06      | 0.11      | 0.03      | 0.11     | 0.21  | 7.00%  | NotFunctional   |
| 0.03      | 0.05      | 0.03      | 0.03     | 0.55  | 35.60% | NotFunctional   |
| 0.06      | 0.20      | 0.03      | 0.07     | 0.32  | 9.10%  | NotFunctional   |
| 0.23      | 0.28      | 0.22      | 0.28     | 0.34  | 35.60% | NotFunctional   |
| 0.35      | 0.56      | 0.27      | 0.37     | 0.36  | 5.46%  | NotFunctional   |

FIGURE S1. Heatmap of epigenetic features vs. class in the FUN-LDA model with nine classes across tissues and cell types in Roadmap.

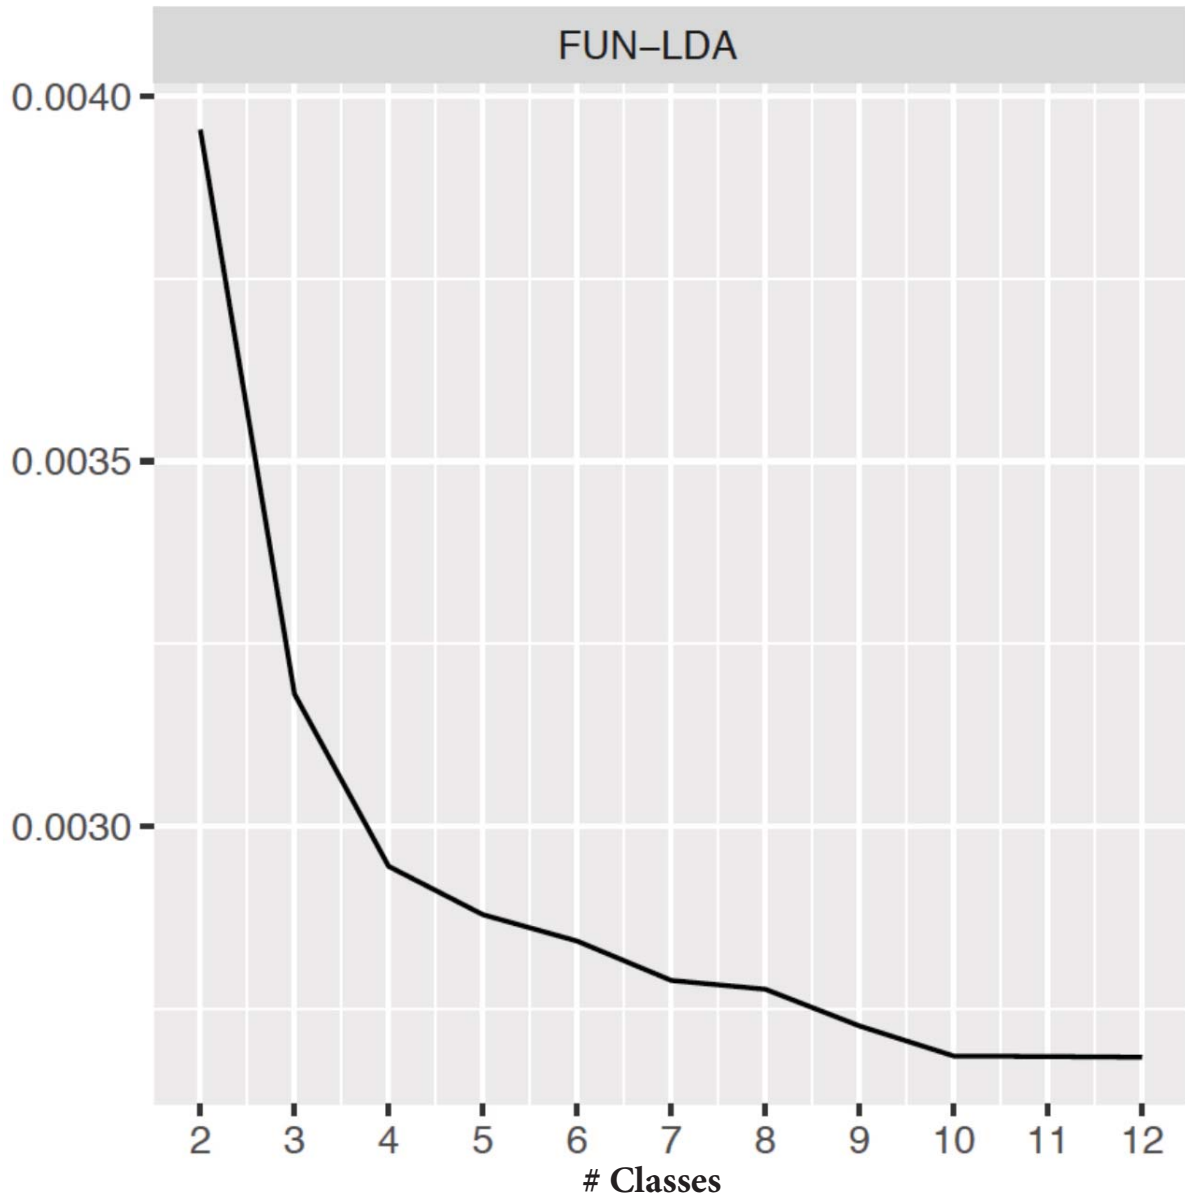

FIGURE S2. Perplexity measure of FUN-LDA models as a function of the number of classes.

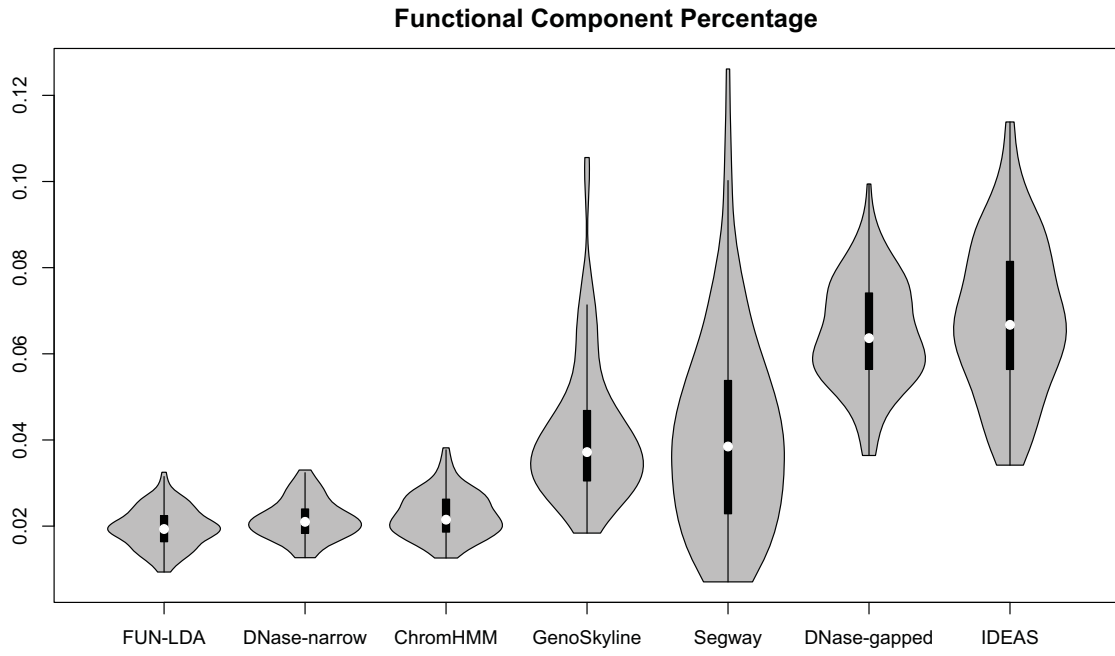

FIGURE S3. Violin plots showing the distribution of proportion of functional variants across tissues in Roadmap for each of several methods.

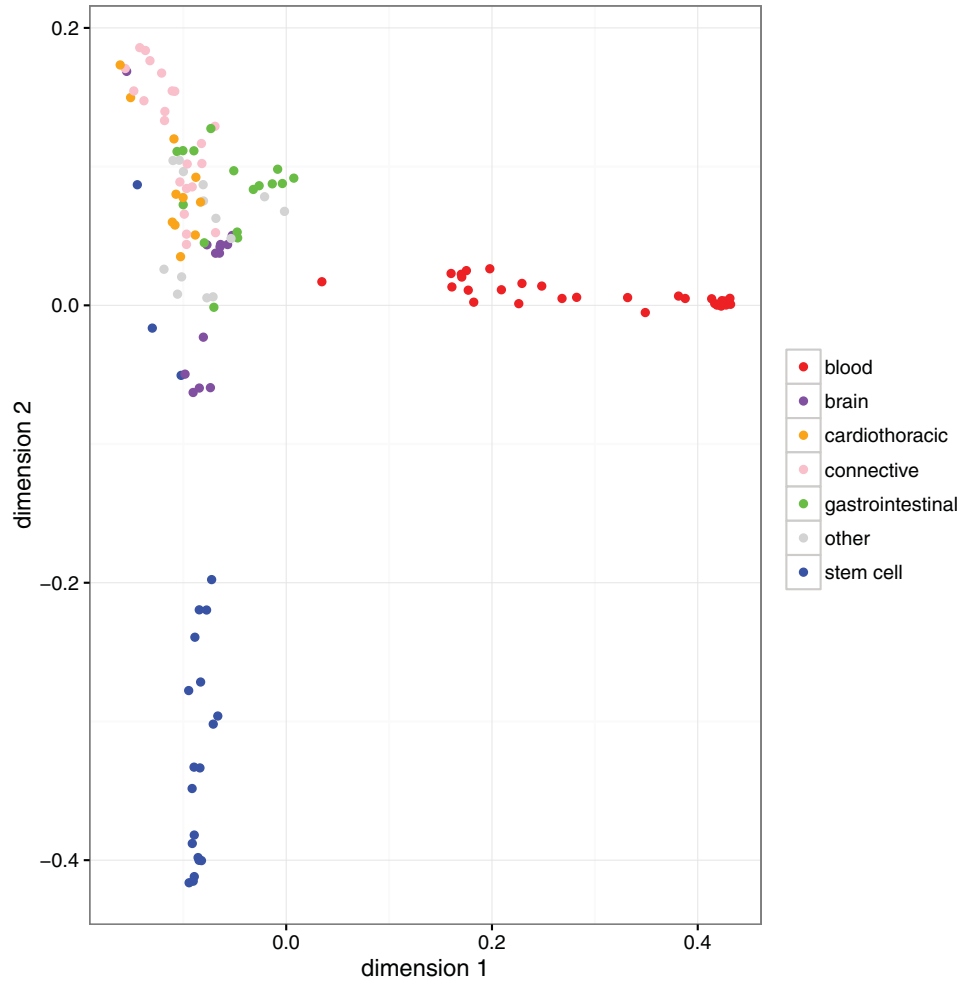

FIGURE S4. Multidimensional scaling plot of the correlations between the functional scores for the different tissues (FUN-LDA).



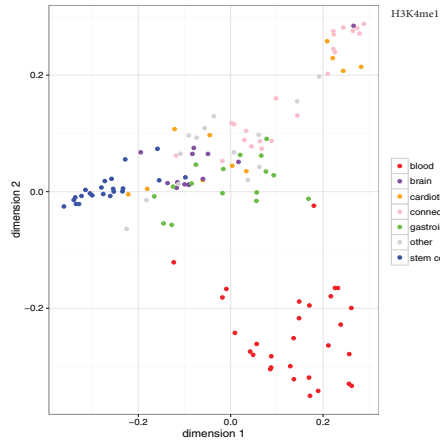

(A) H3K4me1

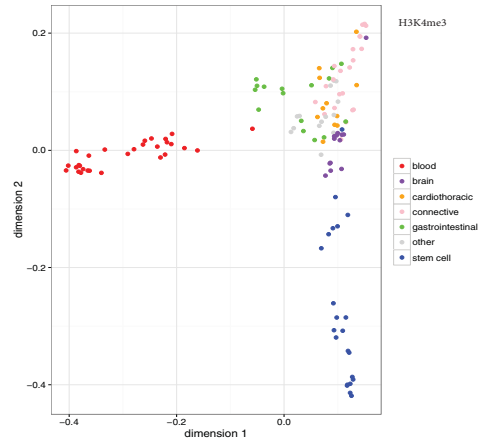

(B) H3K4me3

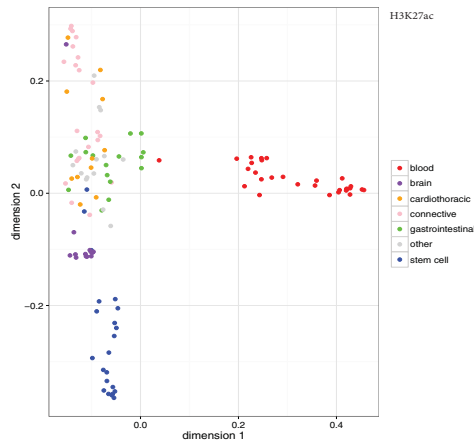

(C) H3K27ac

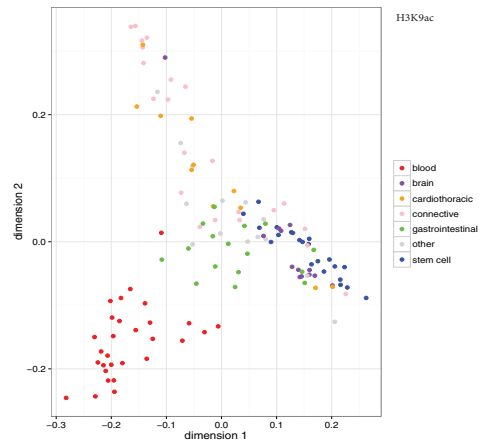

(D) H3K9ac

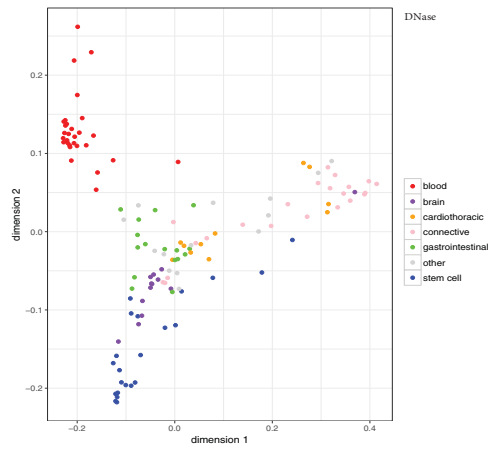

(E) DNase

FIGURE S5. Multidimensional scaling plots of the correlations between the functional scores for the different tissues using individual histone marks and DNase.

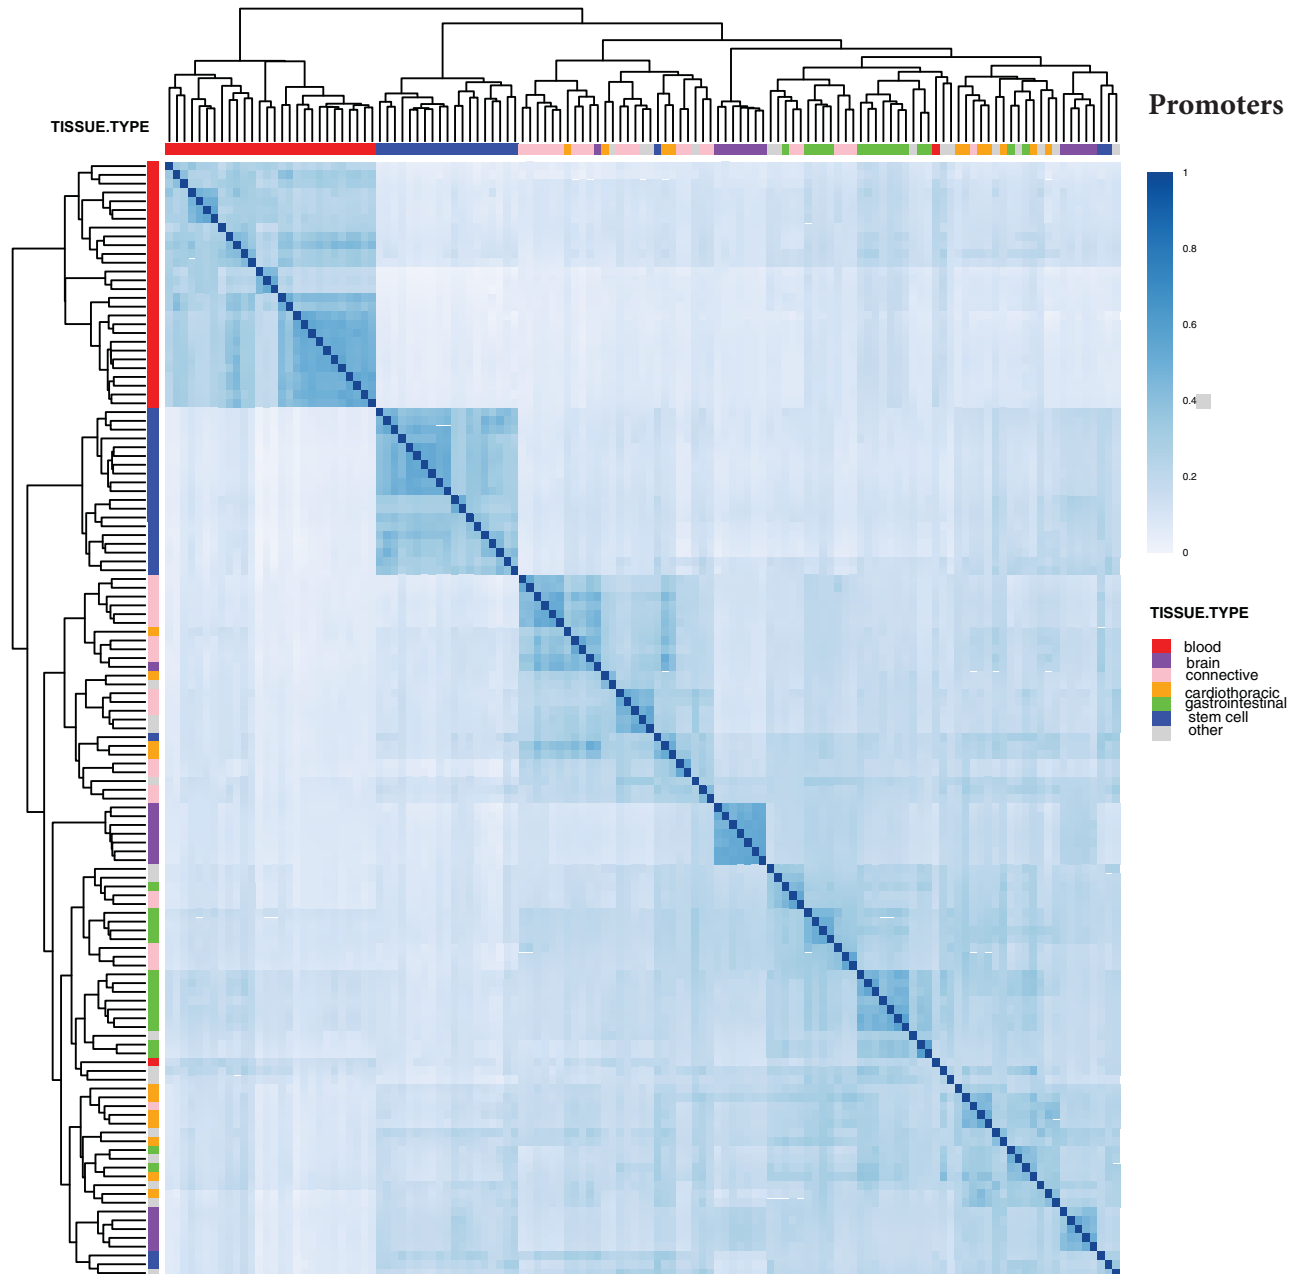

FIGURE S6. Jaccard index of overlap among functional variants falling in *promoter* regions in different cell types and tissues in Roadmap (FUN-LDA). Hierarchical clustering is used to cluster the different cell types and tissues.

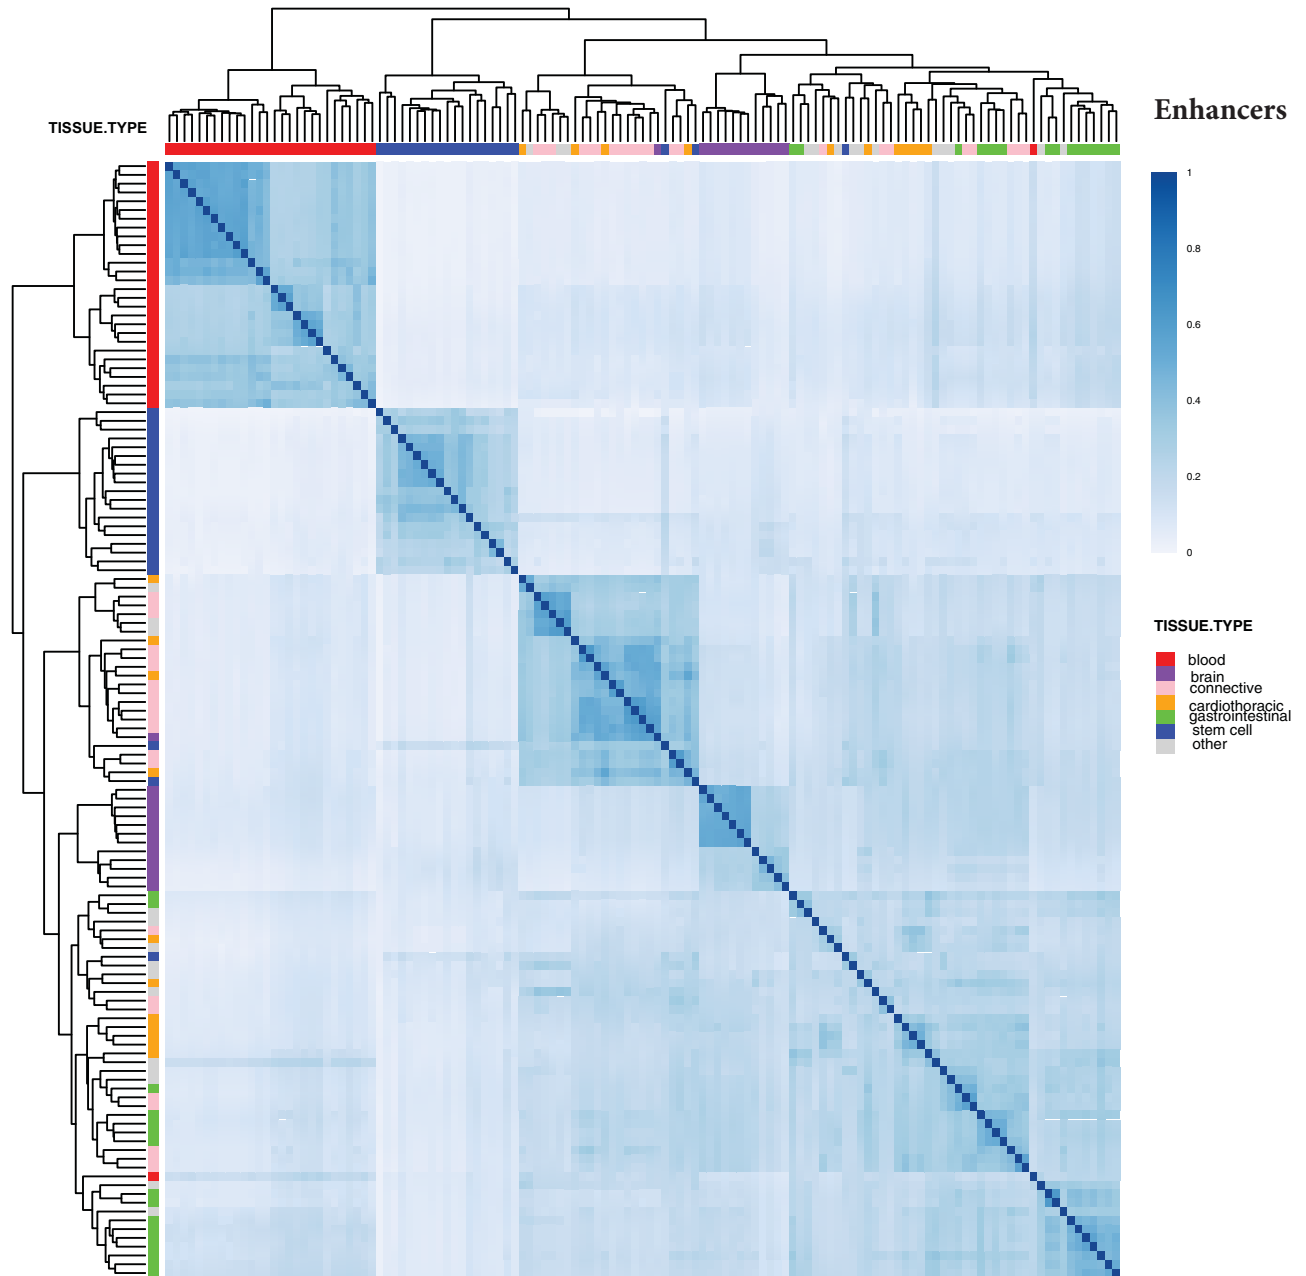

FIGURE S7. Jaccard index of overlap among functional variants falling in *enhancer* regions in different cell types and tissues in Roadmap (FUN-LDA). Hierarchical clustering is used to cluster the different cell types and tissues.

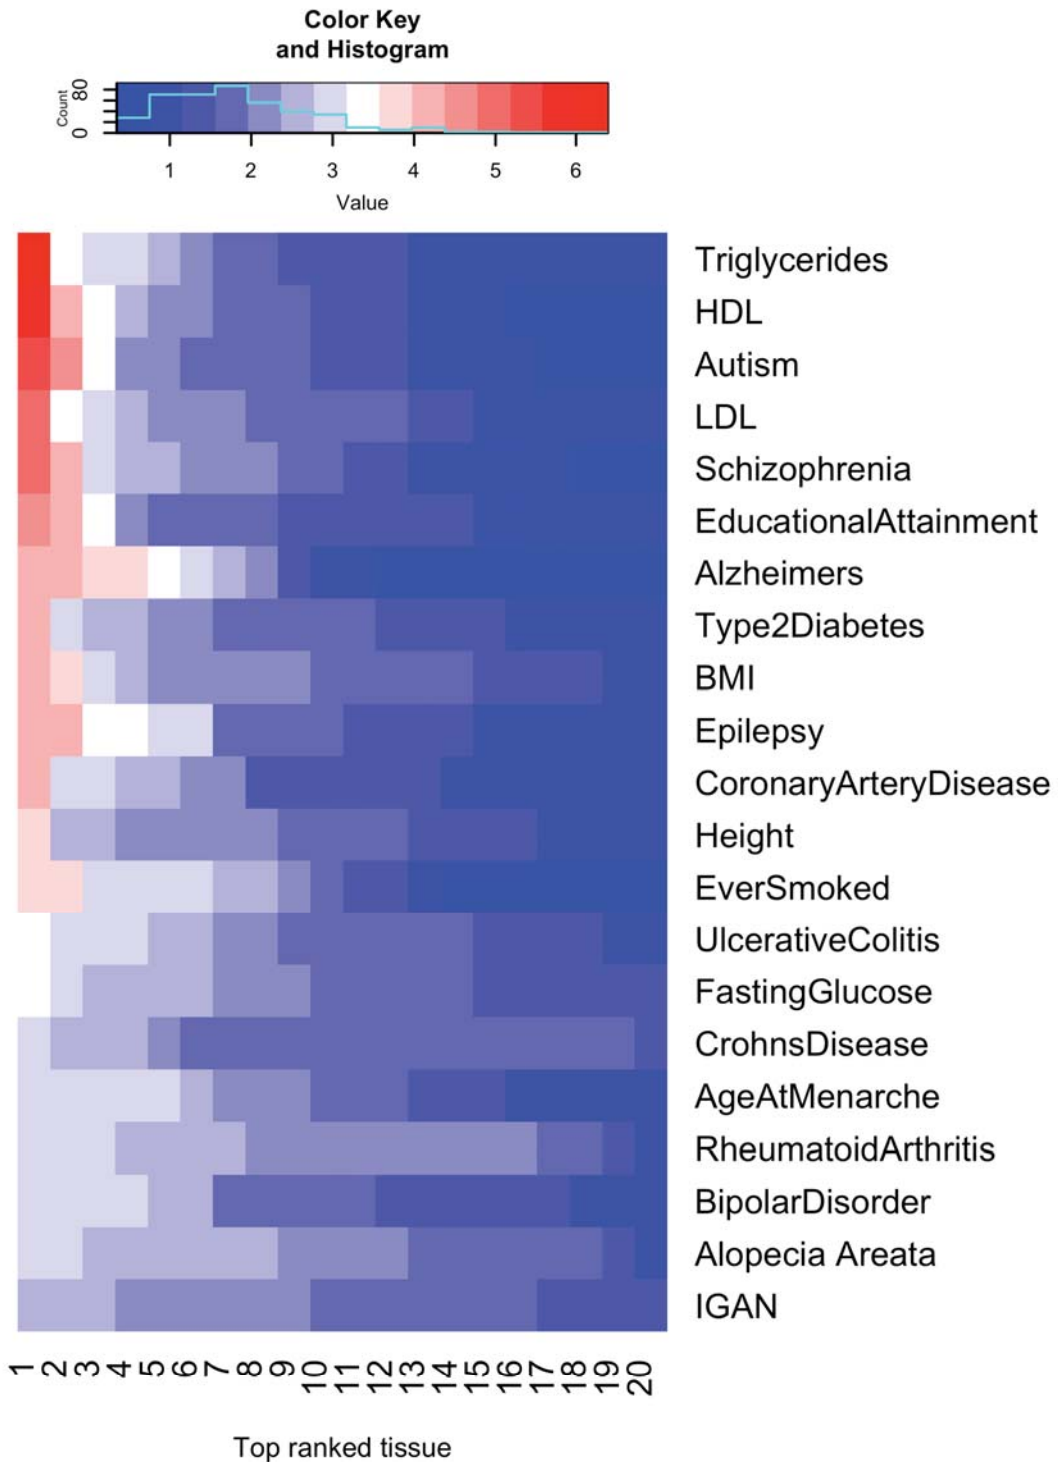

FIGURE S8. Heatmap of LD score regression analysis. Each row presents top 20 tissues for one of the 21 complex traits. Each cell represents the  $-\log_{10}(p \text{ value})$  standardized within trait.

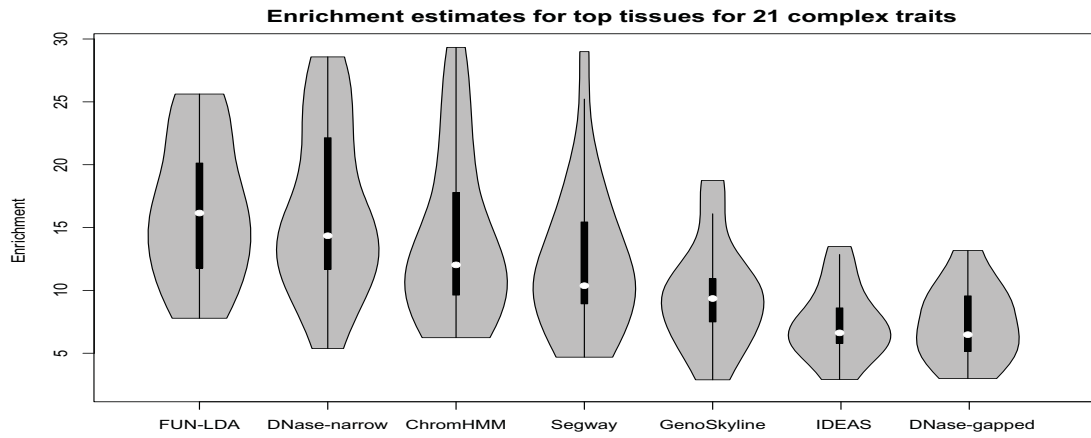

(A) Enrichments estimates.

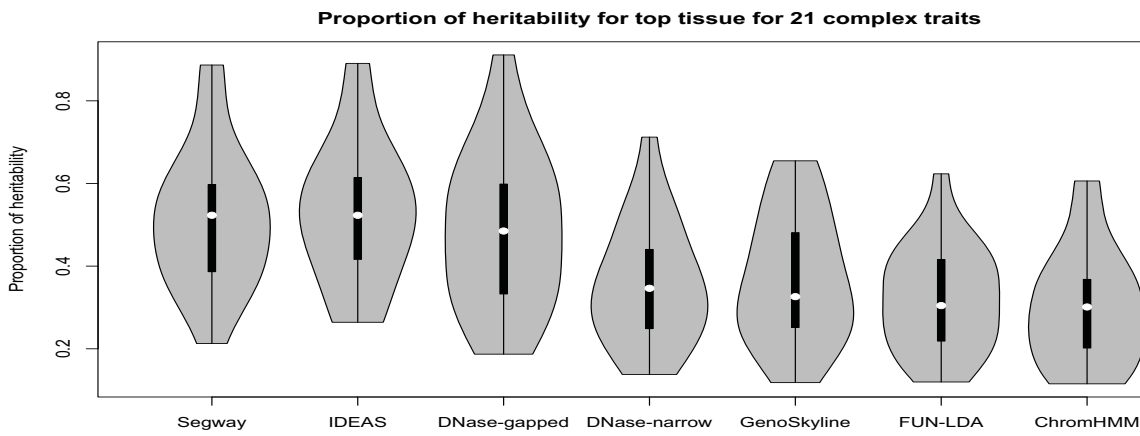

(B) Proportion of heritability.

FIGURE S9. Enrichment estimates (the proportion of SNP heritability in the functional component divided by the proportion of SNPs in that component) and proportion of heritability for different methods across top tissues for 21 complex traits. Estimates for DNase are omitted since they do not make sense for continuous annotations, such as quantitative DNase.

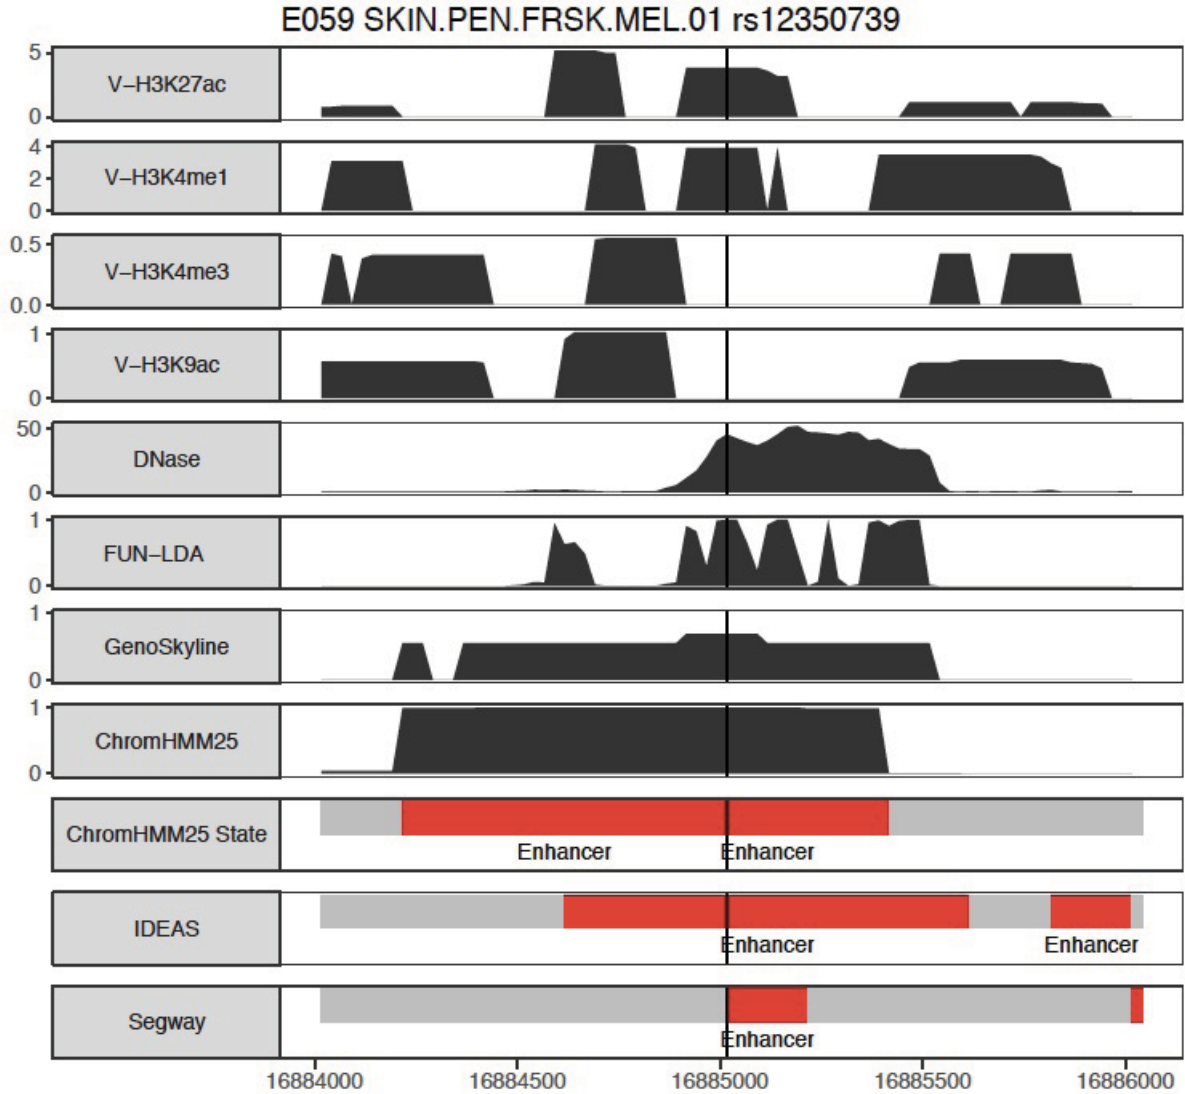

FIGURE S10. rs12350739 in Roadmap tissue E059. Valley scores for four activating histone marks and DNase, posterior probabilities from FUN-LDA, GenoSkyline, and ChromHMM (25 state model), and segmentations from ChromHMM, IDEAS and Segway are shown in 2 kb windows centered around the lead SNPs. For clarity we only highlight in the segmentations the type of states we consider functional (enhancer states in red, promoter states in blue) for the different segmentation approaches.

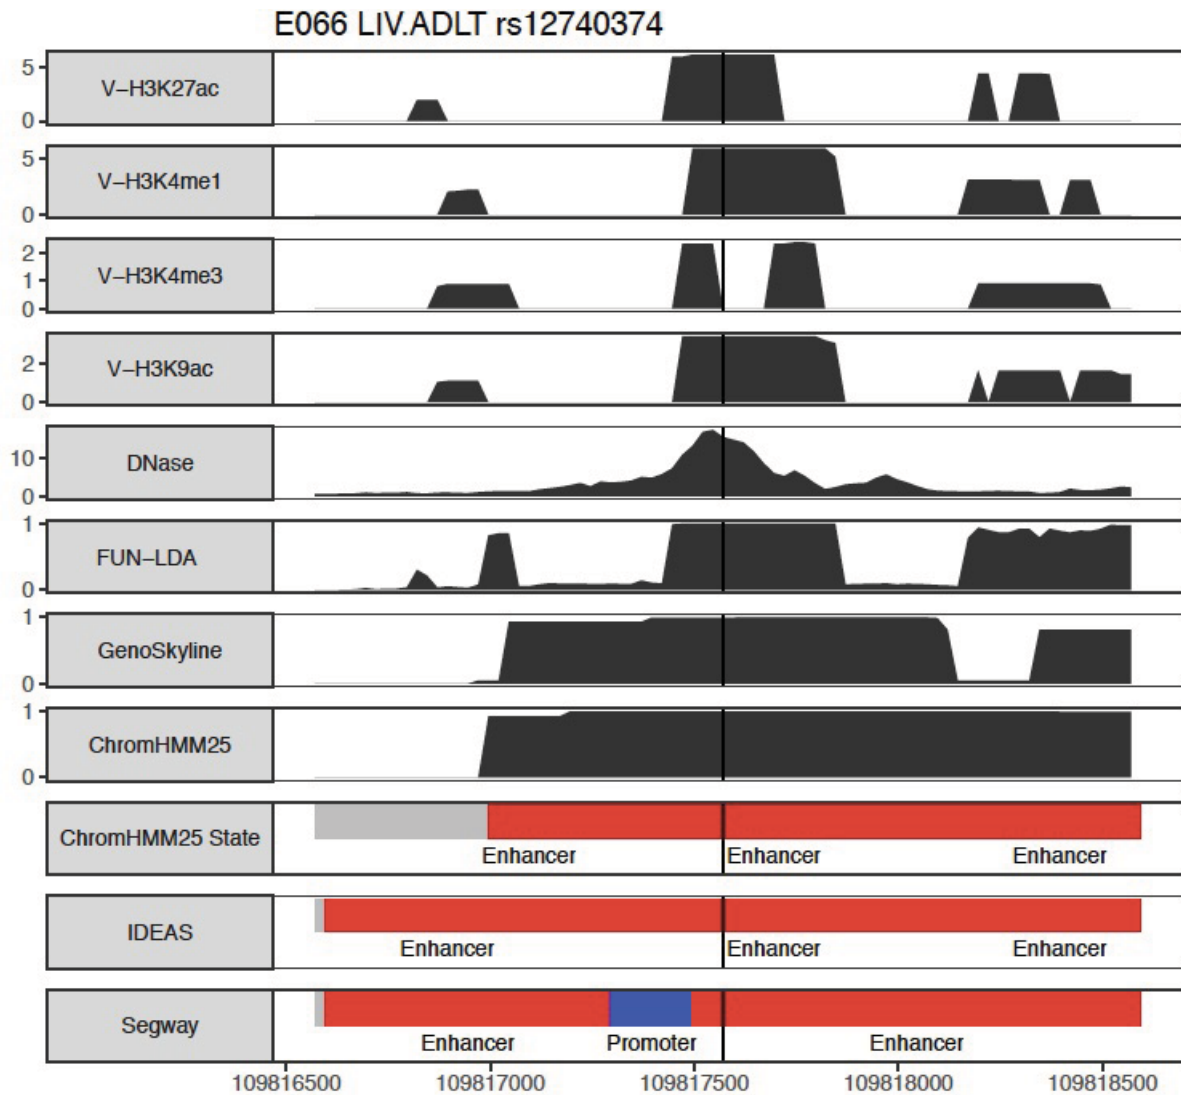

FIGURE S11. rs12740374 in Roadmap tissue E066. Valley scores for four activating histone marks and DNase, posterior probabilities from FUN-LDA, GenoSkyline, and ChromHMM (25 state model), and segmentations from ChromHMM, IDEAS and Segway are shown in 2 kb windows centered around the lead SNPs. For clarity we only highlight in the segmentations the type of states we consider functional (enhancer states in red, promoter states in blue) for the different segmentation approaches.

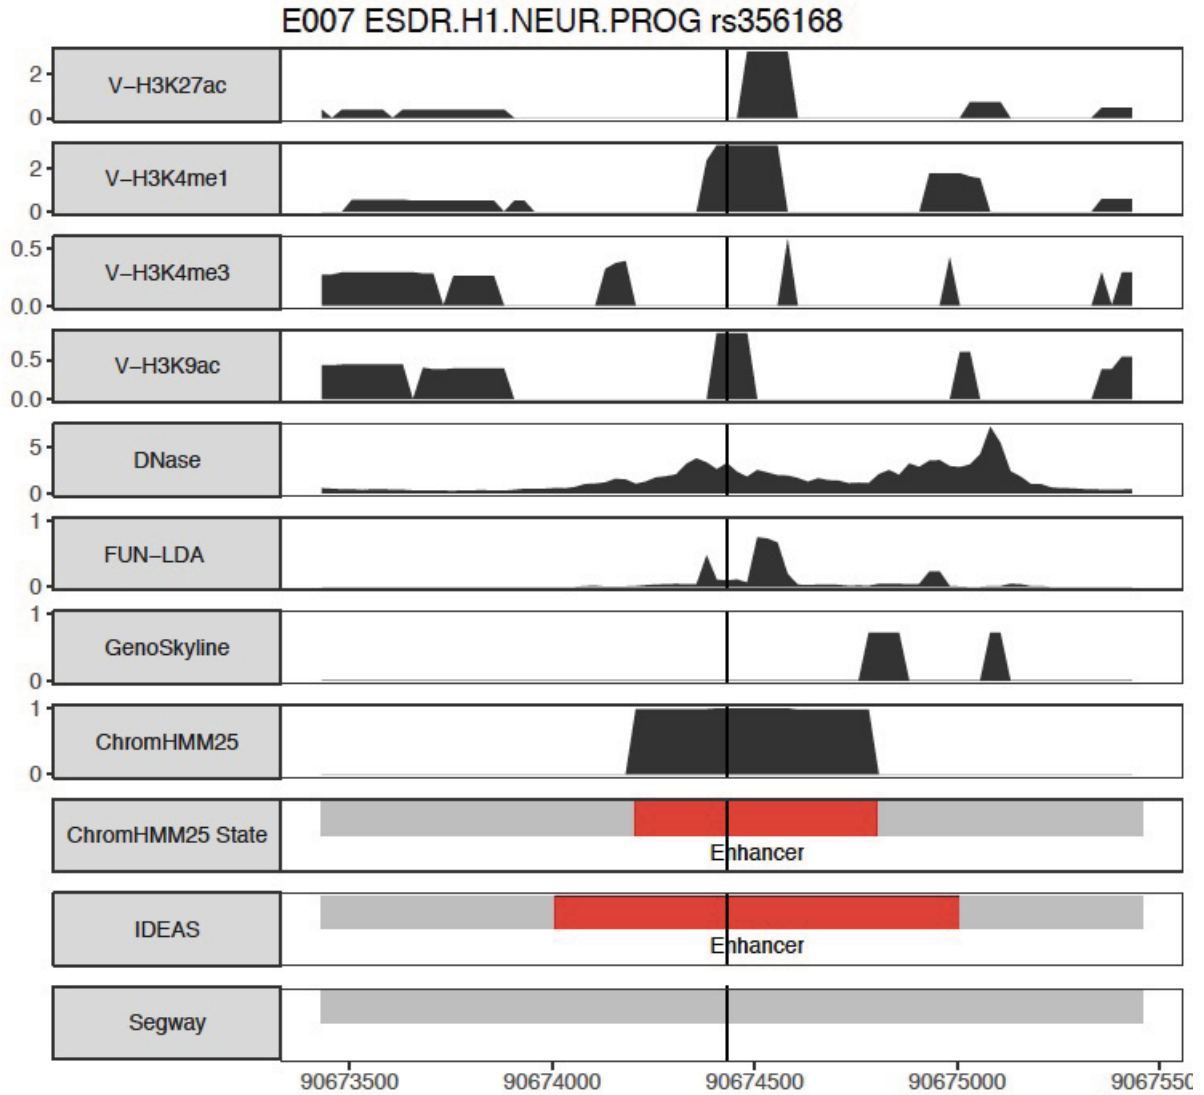

FIGURE S12. rs356168 in Roadmap tissue E007. Valley scores for four activating histone marks and DNase, posterior probabilities from FUN-LDA, GenoSkyline, and ChromHMM (25 state model), and segmentations from ChromHMM, IDEAS and Segway are shown in 2 kb windows centered around the lead SNPs. For clarity we only highlight in the segmentations the type of states we consider functional (enhancer states in red, promoter states in blue) for the different segmentation approaches.



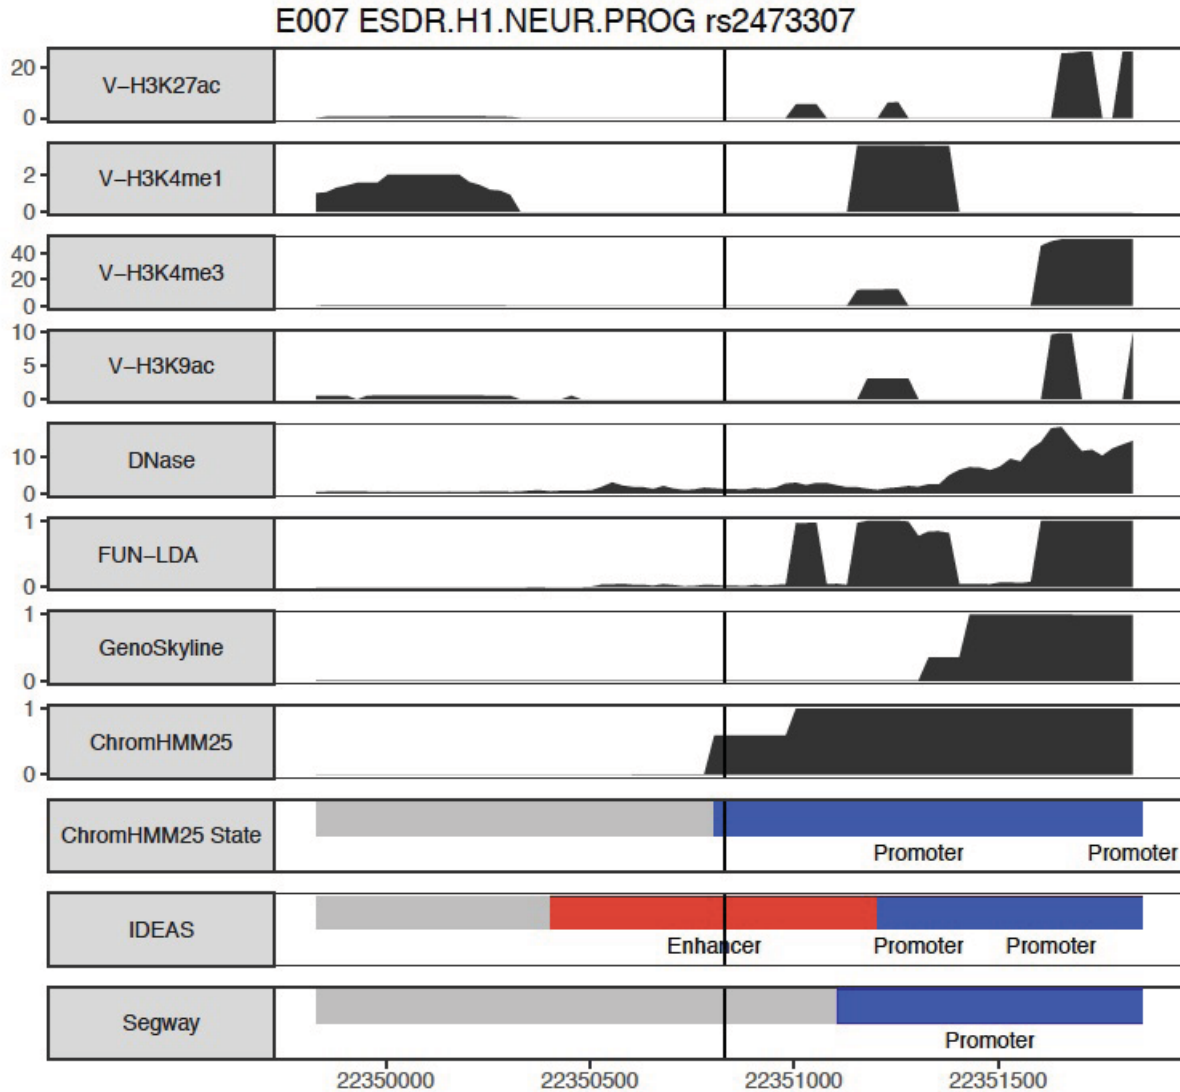

FIGURE S13. rs2473307 in Roadmap tissue E007. Valley scores for four activating histone marks and DNase, posterior probabilities from FUN-LDA, GenoSkyline, and ChromHMM (25 state model), and segmentations from ChromHMM, IDEAS and Segway are shown in 2 kb windows centered around the lead SNPs. For clarity we only highlight in the segmentations the type of states we consider functional (enhancer states in red, promoter states in blue) for the different segmentation approaches.

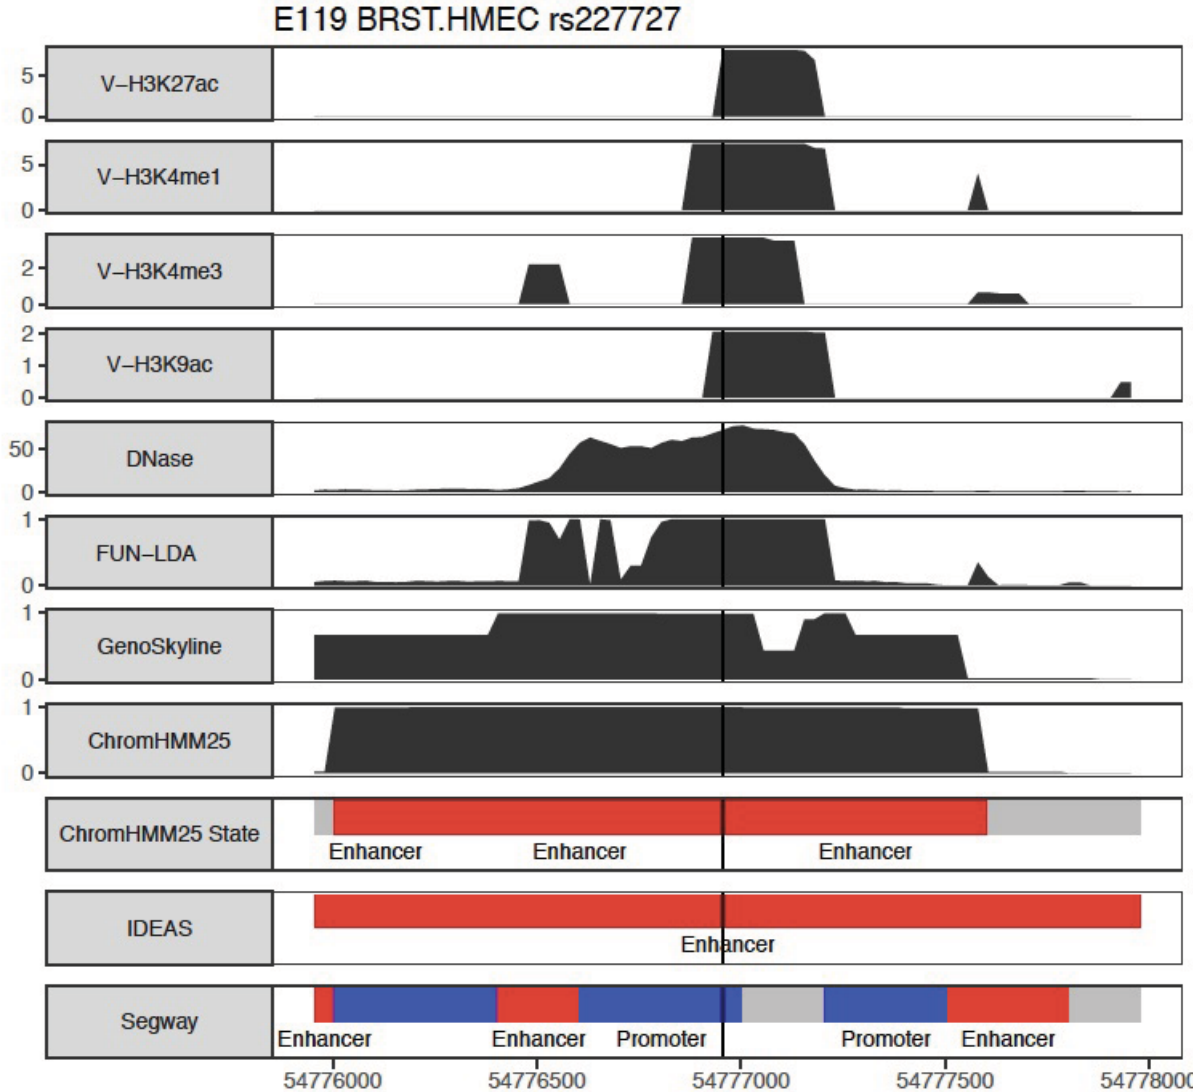

FIGURE S14. rs227727 in Roadmap tissue E119. Valley scores for four activating histone marks and DNase, posterior probabilities from FUN-LDA, GenoSkyline, and ChromHMM (25 state model), and segmentations from ChromHMM, IDEAS and Segway are shown in 2 kb windows centered around the lead SNPs. For clarity we only highlight in the segmentations the type of states we consider functional (enhancer states in red, promoter states in blue) for the different segmentation approaches.

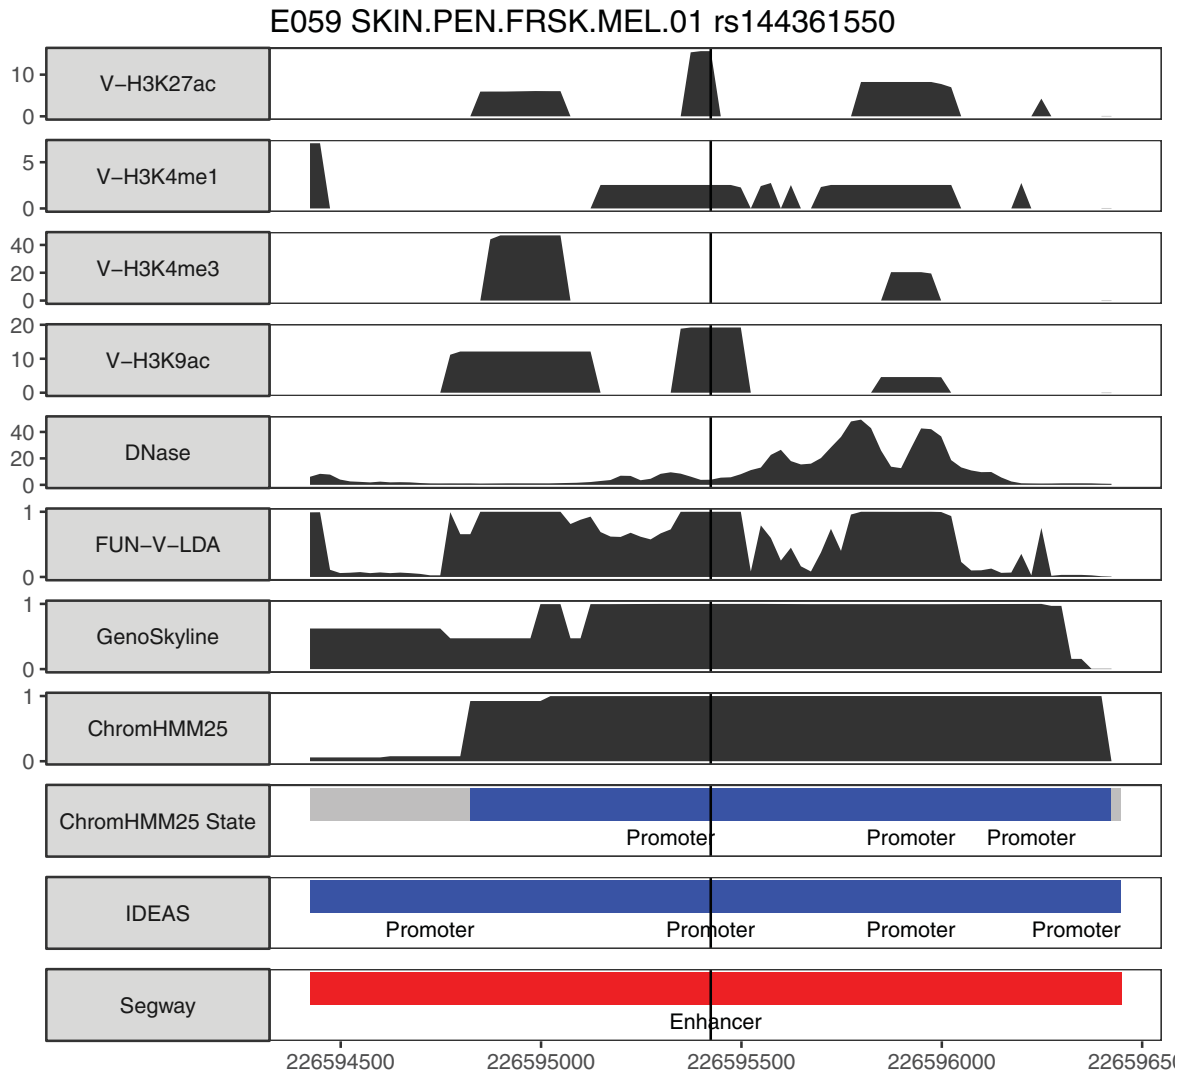

FIGURE S15. rs144361550 in Roadmap tissue E059. Valley scores for four activating histone marks and DNase, posterior probabilities from FUN-LDA, GenoSkyline, and ChromHMM (25 state model), and segmentations from ChromHMM, IDEAS and Segway are shown in 2 kb windows centered around the lead SNPs. For clarity we only highlight in the segmentations the type of states we consider functional (enhancer states in red, promoter states in blue) for the different segmentation approaches.

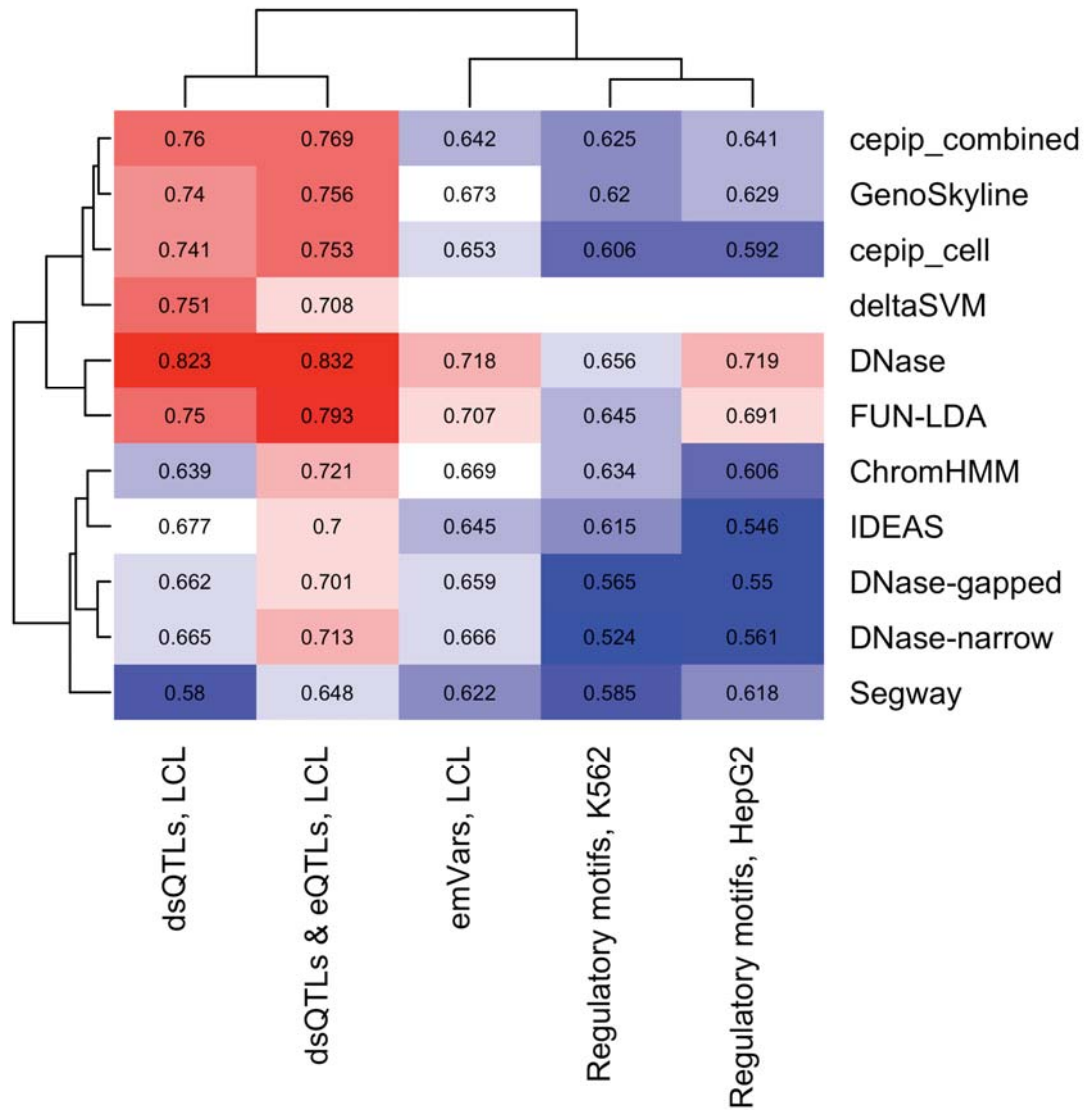

FIGURE S16. Tissue/cell type specific functional predictions. AUROC values for discriminating between variants likely to be functional and control variants. Results are shown for several datasets (three different cell lines) with experimental validation (MPRA) of potential regulatory variants, and one dsQTL dataset (dsQTLs & eQTLs contains a subset of dsQTLs that are also eQTLs). Methods include FUN-LDA, GenoSkyline, ChromHMM (25 state model), Segway, IDEAS, DNase (quantitative, -narrow and -gapped), cepip, and deltaSVM (note that deltaSVM predictions are only available for the dsQTL dataset). Each row represents a method and each column represents a dataset. The methods and datasets are grouped using hierarchical cluster analysis.

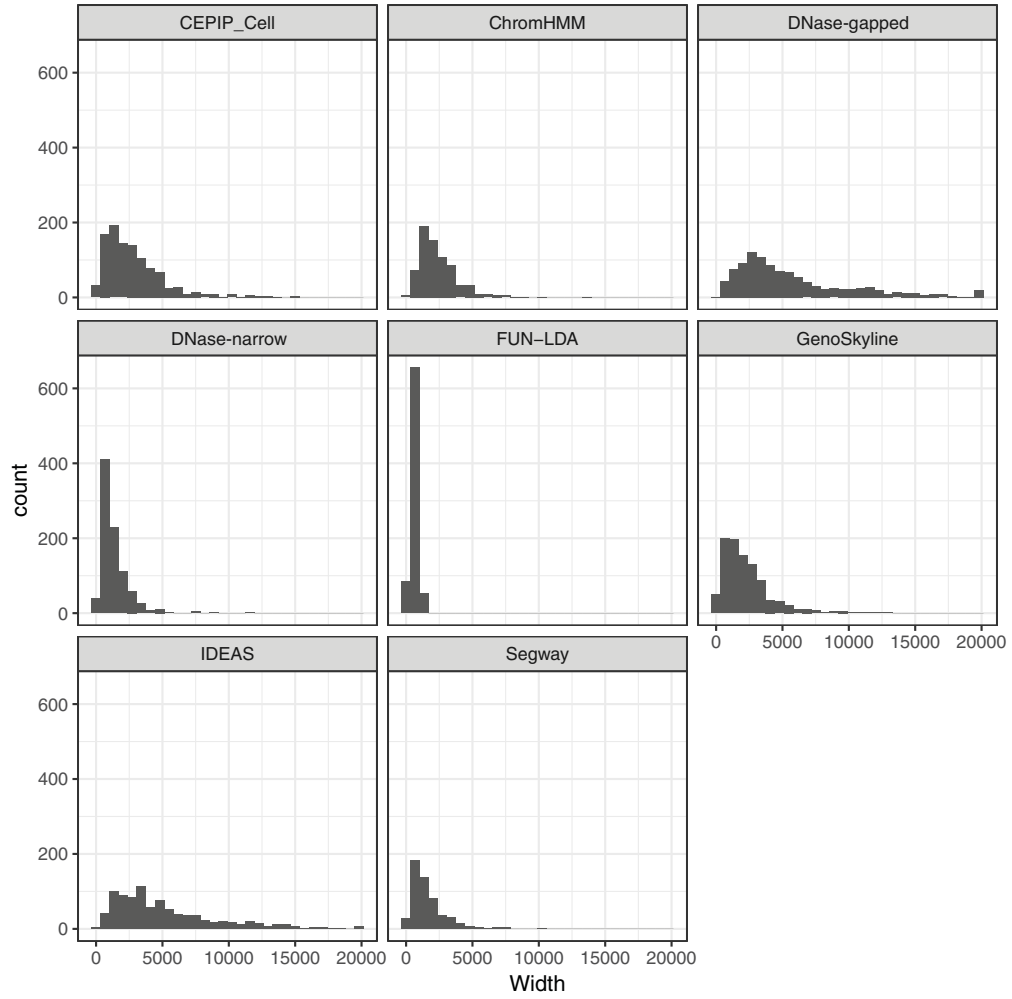

FIGURE S17. Widths of predicted functional regions (in bps) including validated functional variants from<sup>8,9</sup> and the eight confirmed variants in Table S8.

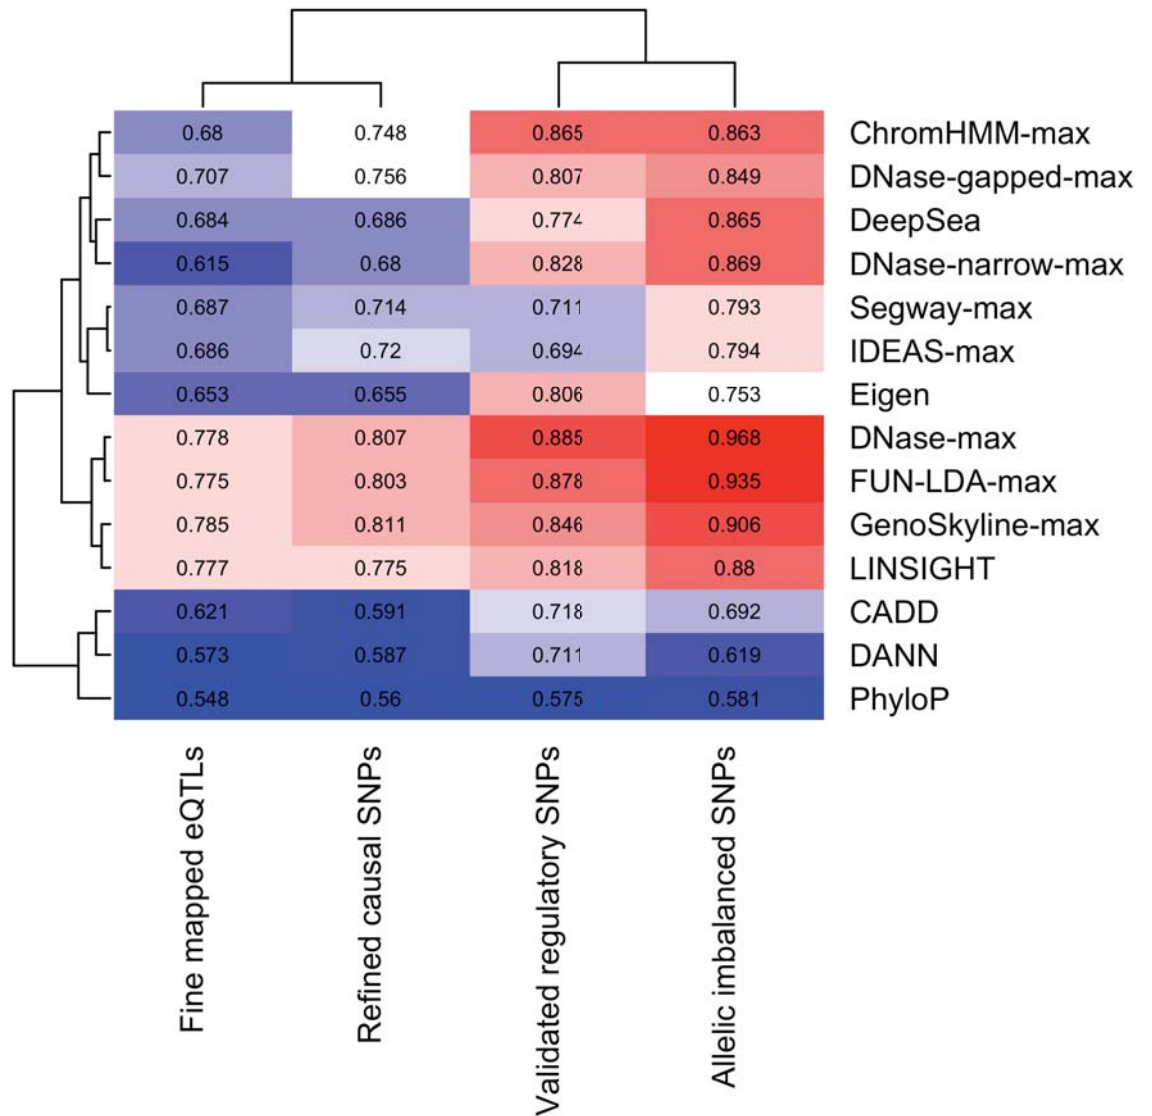

FIGURE S18. Organism level functional prediction. AUROC values for discriminating between variants likely to be functional and control variants for four non-tissue specific datasets. Methods include FUN-LDA-max (maximum across 127 different tissues), GenoSkyline-max, ChromHMM-max (25 state model), Segway-max, IDEAS-max, and DNase-max (quantitative, -narrow and -gapped). In addition, results for several organism level functional prediction methods, including phyloP, Eigen, CADD, DANN, DeepSea and LINSIGHT, are also reported. Each row represents a method and each column represents a dataset. The methods and datasets are grouped using hierarchical cluster analysis.

TABLE S1. Definition of the functional class for the five integrative methods considered.

| Method                    | Functional Class Definition                                          |
|---------------------------|----------------------------------------------------------------------|
| FUN-LDA                   | States 1 and 2 (active promoters and enhancers) in Figure S1         |
| GenoSkyline               | The functional class as defined in <sup>10</sup>                     |
| ChromHMM (25 state model) | 1_TssA, 2_PromU, 3_PromD1, 4_PromD2, 13_EnhA1, 14_EnhA2, 15_EnhAF    |
| Segway                    | Promoters and Enhancers <sup>11</sup>                                |
| IDEAS                     | 4_Enh, 6_EnhG, 8_TssAFlnk, 10_TssA, 14_TssWk, 17_EnhGA <sup>12</sup> |

TABLE S2. GTEx tissues and sample sizes.

| Tissue                                    | Sample size |
|-------------------------------------------|-------------|
| Muscle - Skeletal                         | 361         |
| Whole Blood                               | 338         |
| Skin - Sun Exposed (Lower leg)            | 302         |
| Adipose - Subcutaneous                    | 298         |
| Artery - Tibial                           | 285         |
| Lung                                      | 278         |
| Thyroid                                   | 278         |
| Cells - Transformed fibroblasts           | 272         |
| Nerve - Tibial                            | 256         |
| Esophagus - Mucosa                        | 241         |
| Esophagus - Muscularis                    | 218         |
| Artery - Aorta                            | 197         |
| Skin - Not Sun Exposed (Suprapubic)       | 196         |
| Heart - Left Ventricle                    | 190         |
| Adipose - Visceral (Omentum)              | 185         |
| Breast - Mammary Tissue                   | 183         |
| Stomach                                   | 170         |
| Colon - Transverse                        | 169         |
| Heart - Atrial Appendage                  | 159         |
| Testis                                    | 157         |
| Pancreas                                  | 149         |
| Esophagus - Gastroesophageal Junction     | 127         |
| Adrenal Gland                             | 126         |
| Colon - Sigmoid                           | 124         |
| Artery - Coronary                         | 118         |
| Cells - EBV-transformed lymphocytes       | 114         |
| Brain - Cerebellum                        | 103         |
| Brain - Caudate (basal ganglia)           | 100         |
| Liver                                     | 97          |
| Brain - Cortex                            | 96          |
| Brain - Nucleus accumbens (basal ganglia) | 93          |
| Brain - Frontal Cortex (BA9)              | 92          |
| Brain - Cerebellar Hemisphere             | 89          |
| Spleen                                    | 89          |
| Pituitary                                 | 87          |
| Prostate                                  | 87          |
| Ovary                                     | 85          |
| Brain - Putamen (basal ganglia)           | 82          |
| Brain - Hippocampus                       | 81          |
| Brain - Hypothalamus                      | 81          |
| Vagina                                    | 79          |
| Small Intestine - Terminal Ileum          | 77          |
| Brain - Anterior cingulate cortex (BA24)  | 72          |
| Uterus                                    | 70          |
| Brain - Amygdala                          | 62          |
| Brain - Spinal cord (cervical c-1)        | 59          |
| Brain - Substantia nigra                  | 56          |
| Minor Salivary Gland                      | 51          |
| Kidney - Cortex                           | 26          |
| Bladder                                   | 11          |
| Cervix - Ectocervix                       | 6           |
| Fallopian Tube                            | 6           |
| Cervix - Endocervix                       | 5           |



TABLE S3. Tissues and Cell Types in Roadmap (part 1)

| Epigenome.ID | Epigenome.Mnemonic         | Standardized.Epigenome.name                                    |
|--------------|----------------------------|----------------------------------------------------------------|
| E017         | LNG.IMR90                  | IMR90 fetal lung fibroblasts Cell Line                         |
| E002         | ESC.WA7                    | ES-WA7 Cells                                                   |
| E008         | ESC.H9                     | H9 Cells                                                       |
| E001         | ESC.I3                     | ES-I3 Cells                                                    |
| E015         | ESC.HUES6                  | HUES6 Cells                                                    |
| E014         | ESC.HUES48                 | HUES48 Cells                                                   |
| E016         | ESC.HUES64                 | HUES64 Cells                                                   |
| E003         | ESC.H1                     | H1 Cells                                                       |
| E024         | ESC.4STAR                  | ES-UCSF4 Cells                                                 |
| E020         | IPSC.20B                   | iPS-20b Cells                                                  |
| E019         | IPSC.18                    | iPS-18 Cells                                                   |
| E018         | IPSC.15b                   | iPS-15b Cells                                                  |
| E021         | IPSC.DF.6.9                | iPS DF 6.9 Cells                                               |
| E022         | IPSC.DF.19.11              | iPS DF 19.11 Cells                                             |
| E007         | ESDR.H1.NEUR.PROG          | H1 Derived Neuronal Progenitor Cultured Cells                  |
| E009         | ESDR.H9.NEUR.PROG          | H9 Derived Neuronal Progenitor Cultured Cells                  |
| E010         | ESDR.H9.NEUR               | H9 Derived Neuron Cultured Cells                               |
| E013         | ESDR.CD56.MESO             | hESC Derived CD56+ Mesoderm Cultured Cells                     |
| E012         | ESDR.CD56.ECTO             | hESC Derived CD56+ Ectoderm Cultured Cells                     |
| E011         | ESDR.CD184.ENDO            | hESC Derived CD184+ Endoderm Cultured Cells                    |
| E004         | ESDR.H1.BMP4.MESO          | H1 BMP4 Derived Mesendoderm Cultured Cells                     |
| E005         | ESDR.H1.BMP4.TROP          | H1 BMP4 Derived Trophoblast Cultured Cells                     |
| E006         | ESDR.H1.MSC                | H1 Derived Mesenchymal Stem Cells                              |
| E062         | BLD.PER.MONUC.PC           | Primary mononuclear cells from peripheral blood                |
| E034         | BLD.CD3.PPC                | Primary T cells from peripheral blood                          |
| E045         | BLD.CD4.CD25I.CD127.TMEMPC | Primary T cells effector/memory enriched from peripheral blood |
| E033         | BLD.CD3.CPC                | Primary T cells from cord blood                                |
| E044         | BLD.CD4.CD25.CD127M.TREGPC | Primary T regulatory cells from peripheral blood               |
| E043         | BLD.CD4.CD25M.TPC          | Primary T helper cells from peripheral blood                   |
| E039         | BLD.CD4.CD25M.CD45RA.NPC   | Primary T helper naive cells from peripheral blood             |
| E041         | BLD.CD4.CD25M.IL17M.PL.TPC | Primary T helper cells PMA-I stimulated                        |
| E042         | BLD.CD4.CD25M.IL17P.PL.TPC | Primary T helper 17 cells PMA-I stimulated                     |
| E040         | BLD.CD4.CD25M.CD45RO.MPC   | Primary T helper memory cells from peripheral blood 1          |
| E037         | BLD.CD4.MPC                | Primary T helper memory cells from peripheral blood 2          |
| E048         | BLD.CD8.MPC                | Primary T CD8+ memory cells from peripheral blood              |
| E038         | BLD.CD4.NPC                | Primary T helper naive cells from peripheral blood             |
| E047         | BLD.CD8.NPC                | Primary T CD8+ naive cells from peripheral blood               |
| E029         | BLD.CD14.PC                | Primary monocytes from peripheral blood                        |
| E031         | BLD.CD19.CPC               | Primary B cells from cord blood                                |
| E035         | BLD.CD34.PC                | Primary hematopoietic stem cells                               |
| E051         | BLD.MOB.CD34.PC.M          | Primary hematopoietic stem cells G-CSF-mobilized Male          |
| E050         | BLD.MOB.CD34.PC.F          | Primary hematopoietic stem cells G-CSF-mobilized Female        |
| E036         | BLD.CD34.CC                | Primary hematopoietic stem cells short term culture            |
| E032         | BLD.CD19.PPC               | Primary B cells from peripheral blood                          |
| E046         | BLD.CD56.PC                | Primary Natural Killer cells from peripheral blood             |
| E030         | BLD.CD15.PC                | Primary neutrophils from peripheral blood                      |
| E026         | STRM.MRW.MSC               | Bone Marrow Derived Cultured Mesenchymal Stem Cells            |
| E049         | STRM.CHON.MRW.DR.MSC       | Mesenchymal Stem Cell Derived Chondrocyte Cultured Cells       |
| E025         | FAT.ADIP.DR.MSC            | Adipose Derived Mesenchymal Stem Cell Cultured Cells           |
| E023         | FAT.MSC.DR.ADIP            | Mesenchymal Stem Cell Derived Adipocyte Cultured Cells         |
| E052         | MUS.SAT                    | Muscle Satellite Cultured Cells                                |
| E055         | SKIN.PEN.FRSK.FIB.01       | Foreskin Fibroblast Primary Cells skin01                       |
| E056         | SKIN.PEN.FRSK.FIB.02       | Foreskin Fibroblast Primary Cells skin02                       |
| E059         | SKIN.PEN.FRSK.MEL.01       | Foreskin Melanocyte Primary Cells skin01                       |
| E061         | SKIN.PEN.FRSK.MEL.03       | Foreskin Melanocyte Primary Cells skin03                       |
| E057         | SKIN.PEN.FRSK.KER.02       | Foreskin Keratinocyte Primary Cells skin02                     |
| E058         | SKIN.PEN.FRSK.KER.03       | Foreskin Keratinocyte Primary Cells skin03                     |
| E028         | BRST.HMEC.35               | Breast variant Human Mammary Epithelial Cells (vHMEC)          |
| E027         | BRST.MYO                   | Breast Myoepithelial Primary Cells                             |
| E054         | BRN.GANGEM.DR.NRSPHR       | Ganglion Eminence derived primary cultured neurospheres        |
| E053         | BRN.CRTX.DR.NRSPHR         | Cortex derived primary cultured neurospheres                   |
| E112         | THYM                       | Thymus                                                         |
| E093         | THYM.FET                   | Fetal Thymus                                                   |

TABLE S4. Tissues and Cell Types in Roadmap (part 2)

| Epigenome.ID | Epigenome.Mnemonic    | Standardized.Epigenome.name                      |
|--------------|-----------------------|--------------------------------------------------|
| E071         | BRN.HIPP.MID          | Brain Hippocampus Middle                         |
| E074         | BRN.SUB.NIG           | Brain Substantia Nigra                           |
| E068         | BRN.ANT.CAUD          | Brain Anterior Caudate                           |
| E069         | BRN.CING.GYR          | Brain Cingulate Gyrus                            |
| E072         | BRN.INF.TMP           | Brain Inferior Temporal Lobe                     |
| E067         | BRN.ANG.GYR           | Brain Angular Gyrus                              |
| E073         | BRN.DL.PRFRTL.CRTX    | Brain_Dorsolateral.Prefrontal.Cortex             |
| E070         | BRN.GRM.MTRX          | Brain Germinal Matrix                            |
| E082         | BRN.FET.F             | Fetal Brain Female                               |
| E081         | BRN.FET.M             | Fetal Brain Male                                 |
| E063         | FAT.ADIP.NUC          | Adipose Nuclei                                   |
| E100         | MUS.PSOAS             | Psoas Muscle                                     |
| E108         | MUS.SKLT.F            | Skeletal Muscle Female                           |
| E107         | MUS.SKLT.M            | Skeletal Muscle Male                             |
| E089         | MUS.TRNK.FET          | Fetal Muscle Trunk                               |
| E090         | MUS.LEG.FET           | Fetal Muscle Leg                                 |
| E083         | HRT.FET               | Fetal Heart                                      |
| E104         | HRT.ATR.R             | Right Atrium                                     |
| E095         | HRT.VENT.L            | Left Ventricle                                   |
| E105         | HRT.VNT.R             | Right Ventricle                                  |
| E065         | VAS.AOR               | Aorta                                            |
| E078         | GI.DUO.SM.MUS         | Duodenum Smooth Muscle                           |
| E076         | GI.CLN.SM.MUS         | Colon Smooth Muscle                              |
| E103         | GI.RECT.SM.MUS        | Rectal Smooth Muscle                             |
| E111         | GI.STMC.MUS           | Stomach Smooth Muscle                            |
| E092         | GI.STMC.FET           | Fetal Stomach                                    |
| E085         | GI.S.INT.FET          | Fetal Intestine Small                            |
| E084         | GI.L.INT.FET          | Fetal Intestine Large                            |
| E109         | GI.S.INT              | Small Intestine                                  |
| E106         | GI.CLN.SIG            | Sigmoid Colon                                    |
| E075         | GI.CLN.MUC            | Colonic Mucosa                                   |
| E101         | GI.RECT.MUC.29        | Rectal Mucosa Donor 29                           |
| E102         | GI.RECT.MUC.31        | Rectal Mucosa Donor 31                           |
| E110         | GI.STMC.MUC           | Stomach Mucosa                                   |
| E077         | GI.DUO.MUC            | Duodenum Mucosa                                  |
| E079         | GI.ESO                | Esophagus                                        |
| E094         | GI.STMC.GAST          | Gastric                                          |
| E099         | PLCNT.AMN             | Placenta Amnion                                  |
| E086         | KID.FET               | Fetal Kidney                                     |
| E088         | LNG.FET               | Fetal Lung                                       |
| E097         | OVR                   | Ovary                                            |
| E087         | PANC.ISLT             | Pancreatic Islets                                |
| E080         | ADRL.GLND.FET         | Fetal Adrenal Gland                              |
| E091         | PLCNT.FET             | Placenta                                         |
| E066         | LIV.ADLT              | Liver                                            |
| E098         | PANC                  | Pancreas                                         |
| E096         | LNG                   | Lung                                             |
| E113         | SPLN                  | Spleen                                           |
| E114         | LNG.A549.ETOH002.CNCR | A549 EtOH 0.02pct Lung Carcinoma Cell Line       |
| E115         | BLD.DND41.CNCR        | Dnd41 TCell Leukemia Cell Line                   |
| E116         | BLD.GM12878           | GM12878 Lymphoblastoid Cells                     |
| E117         | CRVX.HELAS3.CNCR      | HeLa-S3 Cervical Carcinoma Cell Line             |
| E118         | LIV.HEPG2.CNCR        | HepG2 Hepatocellular Carcinoma Cell Line         |
| E119         | BRST.HMEC             | HMEC Mammary Epithelial Primary Cells            |
| E120         | MUS.HSMM              | HSMM Skeletal Muscle Myoblasts Cells             |
| E121         | MUS.HSMMT             | HSMM cell derived Skeletal Muscle Myotubes Cells |
| E122         | VAS.HUVEC             | HUVEC Umbilical Vein Endothelial Primary Cells   |
| E123         | BLD.K562.CNCR         | K562 Leukemia Cells                              |
| E124         | BLD.CD14.MONO         | Monocytes-CD14+ RO01746 Primary Cells            |
| E125         | BRN.NHA               | NH-A Astrocytes Primary Cells                    |
| E126         | SKIN.NHDFAD           | NHDF-Ad Adult Dermal Fibroblast Primary Cells    |
| E127         | SKIN.NHEK             | NHEK-Epidermal Keratinocyte Primary Cells        |
| E128         | LNG.NHLF              | NHLF Lung Fibroblast Primary Cells               |
| E129         | BONE.OSTEO            | Osteoblast Primary Cells                         |

TABLE S5. Results from stratified LD score regression for the different methods (part 1).

| Trait                 | Method       | Roadmap Epigenome Name                                | $-\log_{10}(p)$ |
|-----------------------|--------------|-------------------------------------------------------|-----------------|
| AgeAtMenarche         | ChromHMM     | Cortex derived primary cultured neurospheres          | 4.31            |
| AgeAtMenarche         | DNase        | hESC Derived CD56+ Ectoderm Cultured Cells            | 4.76            |
| AgeAtMenarche         | DNase-gapped | iPS DF 6.9 Cells                                      | 4.16            |
| AgeAtMenarche         | DNase-narrow | ES-UCSF4 Cells                                        | 7.36            |
| AgeAtMenarche         | FUN-LDA      | H9 Derived Neuron Cultured Cells                      | 6.15            |
| AgeAtMenarche         | GenoSkyline  | H1 Derived Neuronal Progenitor Cultured Cells         | 7.96            |
| AgeAtMenarche         | IDEAS        | H1 Derived Neuronal Progenitor Cultured Cells         | 3.47            |
| AgeAtMenarche         | Segway       | H1 Derived Neuronal Progenitor Cultured Cells         | 9.91            |
| Alopecia              | ChromHMM     | Primary T helper cells PMA-I stimulated               | 3.31            |
| Alopecia              | DNase        | Primary T helper 17 cells PMA-I stimulated            | 2.10            |
| Alopecia              | DNase-gapped | Primary T helper 17 cells PMA-I stimulated            | 4.04            |
| Alopecia              | DNase-narrow | Primary T helper memory cells from peripheral blood 1 | 3.81            |
| Alopecia              | FUN-LDA      | Primary T cells from cord blood                       | 3.90            |
| Alopecia              | GenoSkyline  | Primary T helper memory cells from peripheral blood 2 | 3.23            |
| Alopecia              | IDEAS        | Primary T helper 17 cells PMA-I stimulated            | 4.48            |
| Alopecia              | Segway       | Primary T helper 17 cells PMA-I stimulated            | 5.27            |
| Alzheimers            | ChromHMM     | Primary hematopoietic stem cells                      | 1.86            |
| Alzheimers            | DNase        | Monocytes-CD14+ RO01746 Primary Cells                 | 2.05            |
| Alzheimers            | DNase-gapped | Primary hematopoietic stem cells G-CSF-mobilized Male | 3.96            |
| Alzheimers            | DNase-narrow | Primary hematopoietic stem cells G-CSF-mobilized Male | 3.59            |
| Alzheimers            | FUN-LDA      | Primary hematopoietic stem cells G-CSF-mobilized Male | 3.78            |
| Alzheimers            | GenoSkyline  | Monocytes-CD14+ RO01746 Primary Cells                 | 2.91            |
| Alzheimers            | IDEAS        | Primary hematopoietic stem cells G-CSF-mobilized Male | 4.06            |
| Alzheimers            | Segway       | Primary hematopoietic stem cells G-CSF-mobilized Male | 3.79            |
| Autism                | ChromHMM     | Fetal Brain Female                                    | 1.19            |
| Autism                | DNase        | Primary monocytes from peripheral blood               | 1.64            |
| Autism                | DNase-gapped | Primary monocytes from peripheral blood               | 2.16            |
| Autism                | DNase-narrow | Monocytes-CD14+ RO01746 Primary Cells                 | 1.94            |
| Autism                | FUN-LDA      | Primary monocytes from peripheral blood               | 2.41            |
| Autism                | GenoSkyline  | Brain Dorsolateral Prefrontal Cortex                  | 1.26            |
| Autism                | IDEAS        | Liver                                                 | 2.54            |
| Autism                | Segway       | Monocytes-CD14+ RO01746 Primary Cells                 | 2.34            |
| BipolarDisorder       | ChromHMM     | Primary monocytes from peripheral blood               | 2.27            |
| BipolarDisorder       | DNase        | Monocytes-CD14+ RO01746 Primary Cells                 | 2.23            |
| BipolarDisorder       | DNase-gapped | Monocytes-CD14+ RO01746 Primary Cells                 | 3.48            |
| BipolarDisorder       | DNase-narrow | Monocytes-CD14+ RO01746 Primary Cells                 | 2.48            |
| BipolarDisorder       | FUN-LDA      | Fetal Brain Female                                    | 3.20            |
| BipolarDisorder       | GenoSkyline  | Psoas Muscle                                          | 3.73            |
| BipolarDisorder       | IDEAS        | Fetal Brain Male                                      | 3.30            |
| BipolarDisorder       | Segway       | Brain Dorsolateral Prefrontal Cortex                  | 3.70            |
| BMI                   | ChromHMM     | Fetal Brain Female                                    | 2.94            |
| BMI                   | DNase        | ES-UCSF4 Cells                                        | 1.12            |
| BMI                   | DNase-gapped | ES-UCSF4 Cells                                        | 2.58            |
| BMI                   | DNase-narrow | ES-UCSF4 Cells                                        | 4.29            |
| BMI                   | FUN-LDA      | Brain Germinal Matrix                                 | 4.79            |
| BMI                   | GenoSkyline  | Brain Dorsolateral Prefrontal Cortex                  | 6.47            |
| BMI                   | IDEAS        | Brain Angular Gyrus                                   | 4.44            |
| BMI                   | Segway       | iPS DF 19.11 Cells                                    | 4.49            |
| CoronaryArteryDisease | ChromHMM     | Liver                                                 | 3.38            |
| CoronaryArteryDisease | DNase        | Liver                                                 | 2.62            |
| CoronaryArteryDisease | DNase-gapped | Liver                                                 | 4.67            |
| CoronaryArteryDisease | DNase-narrow | Lung                                                  | 3.51            |
| CoronaryArteryDisease | FUN-LDA      | Liver                                                 | 4.61            |
| CoronaryArteryDisease | GenoSkyline  | Lung                                                  | 4.25            |
| CoronaryArteryDisease | IDEAS        | Adipose Nuclei                                        | 3.65            |
| CoronaryArteryDisease | Segway       | Small Intestine                                       | 5.70            |

TABLE S6. Results from stratified LD score regression for the different methods (part 2).

| Trait                 | Method       | Roadmap Epigenome Name                                         | -log <sub>10</sub> (p) |
|-----------------------|--------------|----------------------------------------------------------------|------------------------|
| CrohnsDisease         | ChromHMM     | Primary T helper 17 cells PMA-I stimulated                     | 6.39                   |
| CrohnsDisease         | DNase        | Primary T helper cells PMA-I stimulated                        | 3.84                   |
| CrohnsDisease         | DNase-gapped | Primary B cells from peripheral blood                          | 6.89                   |
| CrohnsDisease         | DNase-narrow | Primary T helper 17 cells PMA-I stimulated                     | 6.90                   |
| CrohnsDisease         | FUN-LDA      | Primary B cells from cord blood                                | 6.25                   |
| CrohnsDisease         | GenoSkyline  | Primary Natural Killer cells from peripheral blood             | 4.95                   |
| CrohnsDisease         | IDEAS        | Primary T helper memory cells from peripheral blood 1          | 7.60                   |
| CrohnsDisease         | Segway       | Primary T helper 17 cells PMA-I stimulated                     | 7.53                   |
| EducationalAttainment | ChromHMM     | Fetal Brain Female                                             | 4.74                   |
| EducationalAttainment | DNase        | Fetal Brain Female                                             | 3.05                   |
| EducationalAttainment | DNase-gapped | Cortex derived primary cultured neurospheres                   | 4.27                   |
| EducationalAttainment | DNase-narrow | Fetal Brain Female                                             | 3.07                   |
| EducationalAttainment | FUN-LDA      | Fetal Brain Female                                             | 5.84                   |
| EducationalAttainment | GenoSkyline  | Brain Dorsolateral Prefrontal Cortex                           | 3.61                   |
| EducationalAttainment | IDEAS        | Fetal Brain Female                                             | 7.32                   |
| EducationalAttainment | Segway       | Fetal Brain Male                                               | 5.55                   |
| Epilepsy              | ChromHMM     | Brain Angular Gyrus                                            | 2.91                   |
| Epilepsy              | DNase        | Dnd41 TCell Leukemia Cell Line                                 | 0.99                   |
| Epilepsy              | DNase-gapped | Brain Hippocampus Middle                                       | 2.36                   |
| Epilepsy              | DNase-narrow | Fetal Thymus                                                   | 1.85                   |
| Epilepsy              | FUN-LDA      | Brain Anterior Caudate                                         | 4.11                   |
| Epilepsy              | GenoSkyline  | Brain Inferior Temporal Lobe                                   | 3.35                   |
| Epilepsy              | IDEAS        | Brain Angular Gyrus                                            | 4.40                   |
| Epilepsy              | Segway       | Brain Angular Gyrus                                            | 4.51                   |
| EverSmoked            | ChromHMM     | Primary T cells effector/memory enriched from peripheral blood | 2.15                   |
| EverSmoked            | DNase        | Brain Inferior Temporal Lobe                                   | 0.61                   |
| EverSmoked            | DNase-gapped | Brain Inferior Temporal Lobe                                   | 1.31                   |
| EverSmoked            | DNase-narrow | Primary hematopoietic stem cells                               | 0.78                   |
| EverSmoked            | FUN-LDA      | Brain Inferior Temporal Lobe                                   | 2.68                   |
| EverSmoked            | GenoSkyline  | Brain Inferior Temporal Lobe                                   | 2.94                   |
| EverSmoked            | IDEAS        | Brain Angular Gyrus                                            | 3.66                   |
| EverSmoked            | Segway       | Brain Inferior Temporal Lobe                                   | 4.16                   |
| FastingGlucose        | ChromHMM     | Pancreatic Islets                                              | 1.44                   |
| FastingGlucose        | DNase        | Fetal Intestine Small                                          | 1.03                   |
| FastingGlucose        | DNase-gapped | Pancreatic Islets                                              | 2.03                   |
| FastingGlucose        | DNase-narrow | iPS-15b Cells                                                  | 1.60                   |
| FastingGlucose        | FUN-LDA      | Pancreatic Islets                                              | 1.45                   |
| FastingGlucose        | GenoSkyline  | H9 Cells                                                       | 2.29                   |
| FastingGlucose        | IDEAS        | Pancreatic Islets                                              | 3.65                   |
| FastingGlucose        | Segway       | Pancreatic Islets                                              | 3.85                   |
| HDL                   | ChromHMM     | Primary monocytes from peripheral blood                        | 2.72                   |
| HDL                   | DNase        | Liver                                                          | 3.94                   |
| HDL                   | DNase-gapped | Adipose Nuclei                                                 | 5.15                   |
| HDL                   | DNase-narrow | Adipose Nuclei                                                 | 4.37                   |
| HDL                   | FUN-LDA      | Liver                                                          | 4.73                   |
| HDL                   | GenoSkyline  | Liver                                                          | 3.67                   |
| HDL                   | IDEAS        | Adipose Nuclei                                                 | 5.63                   |
| HDL                   | Segway       | Liver                                                          | 4.28                   |
| Height                | ChromHMM     | Mesenchymal Stem Cell Derived Chondrocyte Cultured Cells       | 5.55                   |
| Height                | DNase        | Mesenchymal Stem Cell Derived Chondrocyte Cultured Cells       | 4.45                   |
| Height                | DNase-gapped | Mesenchymal Stem Cell Derived Chondrocyte Cultured Cells       | 9.99                   |
| Height                | DNase-narrow | Mesenchymal Stem Cell Derived Chondrocyte Cultured Cells       | 10.81                  |
| Height                | FUN-LDA      | Mesenchymal Stem Cell Derived Chondrocyte Cultured Cells       | 12.28                  |
| Height                | GenoSkyline  | Mesenchymal Stem Cell Derived Chondrocyte Cultured Cells       | 11.31                  |
| Height                | IDEAS        | Mesenchymal Stem Cell Derived Chondrocyte Cultured Cells       | 14.59                  |
| Height                | Segway       | Mesenchymal Stem Cell Derived Chondrocyte Cultured Cells       | 13.40                  |

TABLE S7. Results from stratified LD score regression for the different methods (part 3).

| Trait               | Method       | Roadmap Epigenome Name                                | $-\log_{10}(p)$ |
|---------------------|--------------|-------------------------------------------------------|-----------------|
| IGAN                | ChromHMM     | Dnd41 TCell Leukemia Cell Line                        | 2.35            |
| IGAN                | DNase        | Monocytes-CD14+ RO01746 Primary Cells                 | 1.59            |
| IGAN                | DNase-gapped | Primary T cells from peripheral blood                 | 3.86            |
| IGAN                | DNase-narrow | Primary T helper memory cells from peripheral blood 2 | 4.13            |
| IGAN                | FUN-LDA      | Primary Natural Killer cells from peripheral blood    | 3.28            |
| IGAN                | GenoSkyline  | Primary mononuclear cells from peripheral blood       | 3.64            |
| IGAN                | IDEAS        | Primary T cells from peripheral blood                 | 3.65            |
| IGAN                | Segway       | Primary Natural Killer cells from peripheral blood    | 3.23            |
| LDL                 | ChromHMM     | Liver                                                 | 3.25            |
| LDL                 | DNase        | Liver                                                 | 1.61            |
| LDL                 | DNase-gapped | Liver                                                 | 3.68            |
| LDL                 | DNase-narrow | Fetal Adrenal Gland                                   | 2.64            |
| LDL                 | FUN-LDA      | Liver                                                 | 4.08            |
| LDL                 | GenoSkyline  | Liver                                                 | 4.37            |
| LDL                 | IDEAS        | Liver                                                 | 5.06            |
| LDL                 | Segway       | Liver                                                 | 4.29            |
| RheumatoidArthritis | ChromHMM     | GM12878 Lymphoblastoid Cells                          | 8.25            |
| RheumatoidArthritis | DNase        | Primary T helper cells PMA-I stimulated               | 4.27            |
| RheumatoidArthritis | DNase-gapped | Primary T helper cells PMA-I stimulated               | 7.60            |
| RheumatoidArthritis | DNase-narrow | Primary T helper cells PMA-I stimulated               | 7.51            |
| RheumatoidArthritis | FUN-LDA      | GM12878 Lymphoblastoid Cells                          | 6.93            |
| RheumatoidArthritis | GenoSkyline  | Primary B cells from peripheral blood                 | 5.83            |
| RheumatoidArthritis | IDEAS        | GM12878 Lymphoblastoid Cells                          | 8.84            |
| RheumatoidArthritis | Segway       | Primary T helper 17 cells PMA-I stimulated            | 7.93            |
| Schizophrenia       | ChromHMM     | Fetal Brain Female                                    | 11.88           |
| Schizophrenia       | DNase        | Brain Germinal Matrix                                 | 6.64            |
| Schizophrenia       | DNase-gapped | Fetal Brain Female                                    | 9.01            |
| Schizophrenia       | DNase-narrow | Fetal Brain Female                                    | 9.12            |
| Schizophrenia       | FUN-LDA      | Fetal Brain Female                                    | 14.70           |
| Schizophrenia       | GenoSkyline  | Brain Dorsolateral Prefrontal Cortex                  | 8.95            |
| Schizophrenia       | IDEAS        | Fetal Brain Male                                      | Inf             |
| Schizophrenia       | Segway       | Fetal Brain Male                                      | Inf             |
| Triglycerides       | ChromHMM     | Liver                                                 | 3.49            |
| Triglycerides       | DNase        | Liver                                                 | 4.05            |
| Triglycerides       | DNase-gapped | Liver                                                 | 4.89            |
| Triglycerides       | DNase-narrow | Liver                                                 | 4.06            |
| Triglycerides       | FUN-LDA      | Liver                                                 | 4.11            |
| Triglycerides       | GenoSkyline  | Liver                                                 | 3.63            |
| Triglycerides       | IDEAS        | Liver                                                 | 4.30            |
| Triglycerides       | Segway       | Liver                                                 | 3.86            |
| Type2Diabetes       | ChromHMM     | Fetal Kidney                                          | 1.79            |
| Type2Diabetes       | DNase        | Fetal Intestine Small                                 | 1.27            |
| Type2Diabetes       | DNase-gapped | Pancreatic Islets                                     | 3.67            |
| Type2Diabetes       | DNase-narrow | HepG2 Hepatocellular Carcinoma Cell Line              | 2.91            |
| Type2Diabetes       | FUN-LDA      | Pancreatic Islets                                     | 4.21            |
| Type2Diabetes       | GenoSkyline  | Adipose Nuclei                                        | 2.18            |
| Type2Diabetes       | IDEAS        | Fetal Intestine Small                                 | 3.03            |
| Type2Diabetes       | Segway       | Pancreatic Islets                                     | 3.27            |
| UlcerativeColitis   | ChromHMM     | Primary T helper 17 cells PMA-I stimulated            | 4.26            |
| UlcerativeColitis   | DNase        | Primary T helper cells PMA-I stimulated               | 2.06            |
| UlcerativeColitis   | DNase-gapped | Primary T helper 17 cells PMA-I stimulated            | 3.95            |
| UlcerativeColitis   | DNase-narrow | Primary T helper 17 cells PMA-I stimulated            | 4.84            |
| UlcerativeColitis   | FUN-LDA      | Primary T helper 17 cells PMA-I stimulated            | 4.45            |
| UlcerativeColitis   | GenoSkyline  | Rectal Mucosa Donor 29                                | 3.54            |
| UlcerativeColitis   | IDEAS        | Primary T helper 17 cells PMA-I stimulated            | 4.97            |
| UlcerativeColitis   | Segway       | Primary T helper 17 cells PMA-I stimulated            | 5.77            |

TABLE S8. For eight SNPs selected from literature, the tissue or cell type in the original study and the closest tissue in Roadmap that we selected are given.

| SNP         | Tissue in Functional Study                   | Selected Roadmap Tissue                              |
|-------------|----------------------------------------------|------------------------------------------------------|
| rs6801957   | murine heart tissue                          | E104 - Right Atrium                                  |
| rs12821256  | cultured human keratinocytes                 | E127 - NHEK-Epidermal Keratinocyte Primary Cells     |
| rs12350739  | skin epidermal samples/melanocyte cell lines | E059 - Foreskin Melanocyte Primary Cells skin01      |
| rs12740374  | primary hepatocytes                          | E066 - Liver                                         |
| rs356168    | hiPSC-derived neurons                        | E007 - H1 Derived Neuronal Progenitor Cultured Cells |
| rs2473307   | human neuronal cell line                     | E007 - H1 Derived Neuronal Progenitor Cultured Cells |
| rs227727    | human embryonic oral epithelial cells        | E119 - HMEC Mammary Epithelial Primary Cells         |
| rs144361550 | primary melanocytes                          | E059 - Foreskin Melanocyte Primary Cells skin01      |

TABLE S9. AUROC for various integrative methods vs. individual epigenetic annotations using MPRA validated variants.

| Method       | Type              | emVars |       |       |
|--------------|-------------------|--------|-------|-------|
|              |                   | E116   | E118  | E123  |
| FUN-LDA      |                   | 0.709  | 0.694 | 0.646 |
| GenoSkyline  |                   | 0.674  | 0.630 | 0.619 |
| ChromHMM     | Integrative       | 0.668  | 0.608 | 0.634 |
| Segway       |                   | 0.624  | 0.618 | 0.585 |
| IDEAS        |                   | 0.621  | 0.546 | 0.615 |
| DNase        |                   | 0.722  | 0.719 | 0.654 |
| DNase-narrow |                   | 0.629  | 0.561 | 0.524 |
| DNase-gapped |                   | 0.653  | 0.550 | 0.565 |
| H3K27ac      | Single annotation | 0.677  | 0.556 | 0.597 |
| H3K4me1      |                   | 0.664  | 0.545 | 0.578 |
| H3K4me3      |                   | 0.692  | 0.535 | 0.602 |
| H3K9ac       |                   | 0.670  | 0.549 | 0.615 |

TABLE S10. AUROC for the segmentation methods ChromHMM, Segway and IDEAS state combinations with maximum AUROC using the MPRA validated variants. Note that the selection of the best state combination is based on combining the variants from all three MPRA datasets in Section 2.4.

| Method   | TypeState | States in 'functional' group                                                                  | emVars |       |       |
|----------|-----------|-----------------------------------------------------------------------------------------------|--------|-------|-------|
|          |           |                                                                                               | E116   | E118  | E123  |
| FUN-LDA  | Selected  | 1_ActiveEnhancers, 2_ActivePromoters                                                          | 0.709  | 0.694 | 0.646 |
| ChromHMM | Best      | 1_TssA, 2_PromU, 9_TxReg, 13_EnhA1<br>14_EnhA2, 16_EnhW1, 22_PromP                            | 0.670  | 0.619 | 0.661 |
|          | Selected  | 1_TssA, 2_PromU, 3_PromD1, 4_PromD2<br>13_EnhA1, 14_EnhA2, 15_EnhAF                           | 0.668  | 0.608 | 0.634 |
| Segway   | Best      | Bivalent, RegPermissive, Enhancer, Promoter                                                   | 0.650  | 0.591 | 0.630 |
|          | Selected  | Enhancer, Promoter                                                                            | 0.624  | 0.618 | 0.585 |
| IDEAS    | Best      | 4_Enh, 8_TssAFlnk, 6_EnhG, 10_TssA<br>19_Enh/ReprPC, 11_EnhBiv, 15_TssBiv, 14_TssWk, 17_EnhGA | 0.635  | 0.544 | 0.614 |
|          | Selected  | 4_Enh, 6_EnhG, 8_TssAFlnk, 10_TssA, 14_TssWk, 17_EnhGA                                        | 0.621  | 0.546 | 0.615 |

TABLE S11. Tissue/cell type specific functional predictions. AUROC/AUPR values for discriminating between variants likely to be functional and control variants. Results are shown for validated enhancers in ultra conserved sequence elements<sup>13</sup>. Methods include FUN-LDA, GenoSkyline, ChromHMM (25 state model), Segway, IDEAS, and DNase (quantitative, -narrow and -gapped). The tissues with the highest AUROC/AUPR for each method are also shown. Most of the validated enhancers were shown to affect gene expression in embryonic tissue.

| Dataset                  | Method       | Top Tissue                                  | AUROC |
|--------------------------|--------------|---------------------------------------------|-------|
| Ultra conserved Elements | FUN-LDA      | hESC Derived CD184+ Endoderm Cultured Cells | 0.658 |
|                          | GenoSkyline  | Primary hematopoietic stem cells            | 0.697 |
|                          | ChromHMM     | hESC Derived CD56+ Ectoderm Cultured Cells  | 0.604 |
|                          | Segway       | HUES6 Cells                                 | 0.588 |
|                          | IDEAS        | hESC Derived CD184+ Endoderm Cultured Cells | 0.646 |
|                          | DNase        | hESC Derived CD184+ Endoderm Cultured Cells | 0.629 |
|                          | DNase-narrow | hESC Derived CD184+ Endoderm Cultured Cells | 0.568 |
|                          | DNase-gapped | hESC Derived CD184+ Endoderm Cultured Cells | 0.656 |
| Dataset                  | Method       | Top Tissue                                  | AUPR  |
| Ultra conserved Elements | FUN-LDA      | hESC Derived CD184+ Endoderm Cultured Cells | 0.485 |
|                          | GenoSkyline  | hESC Derived CD184+ Endoderm Cultured Cells | 0.490 |
|                          | ChromHMM     | hESC Derived CD56+ Ectoderm Cultured Cells  | 0.477 |
|                          | Segway       | hESC Derived CD56+ Mesoderm Cultured Cells  | 0.457 |
|                          | IDEAS        | hESC Derived CD184+ Endoderm Cultured Cells | 0.490 |
|                          | DNase        | hESC Derived CD56+ Mesoderm Cultured Cells  | 0.485 |
|                          | DNase-narrow | hESC Derived CD56+ Ectoderm Cultured Cells  | 0.434 |
|                          | DNase-gapped | hESC Derived CD184+ Endoderm Cultured Cells | 0.508 |

TABLE S12. Comparison of FUN-LDA with organism level functional prediction methods on the tissue/cell type specific datasets. AUROC/AUPR values for discriminating between variants likely to be functional and control variants. Results are shown for several datasets (three different cell lines) with experimental validation (MPRA) of potential regulatory variants, and one dsQTL dataset (dsQTLs & eQTLs contains a subset of dsQTLs that are also eQTLs). Methods include tissue/cell type specific FUN-LDA and organism level methods including phyloP (primate), Eigen, CADD, DANN, DeepSea and LINSIGHT.

| Dataset                                        | Method   | AUROC | AUPR  |
|------------------------------------------------|----------|-------|-------|
| emVars in <sup>8</sup> , E116                  | FUN-LDA  | 0.707 | 0.468 |
|                                                | Eigen    | 0.604 | 0.359 |
|                                                | CADD     | 0.569 | 0.241 |
|                                                | DANN     | 0.532 | 0.226 |
|                                                | LINSIGHT | 0.651 | 0.325 |
|                                                | phyloP   | 0.518 | 0.211 |
|                                                | DeepSea  | 0.691 | 0.437 |
| Regulatory motifs in <sup>9</sup> , E118/HepG2 | FUN-LDA  | 0.691 | 0.445 |
|                                                | Eigen    | 0.636 | 0.363 |
|                                                | CADD     | 0.606 | 0.329 |
|                                                | DANN     | 0.623 | 0.381 |
|                                                | LINSIGHT | 0.629 | 0.341 |
|                                                | phyloP   | 0.596 | 0.330 |
|                                                | DeepSea  | 0.646 | 0.347 |
| Regulatory motifs in <sup>9</sup> , E123/K562  | FUN-LDA  | 0.645 | 0.287 |
|                                                | Eigen    | 0.573 | 0.224 |
|                                                | CADD     | 0.538 | 0.189 |
|                                                | DANN     | 0.547 | 0.196 |
|                                                | LINSIGHT | 0.557 | 0.198 |
|                                                | phyloP   | 0.549 | 0.206 |
|                                                | DeepSea  | 0.606 | 0.253 |
| dsQTLs in <sup>14</sup> , E116                 | FUN-LDA  | 0.750 | 0.374 |
|                                                | Eigen    | 0.666 | 0.316 |
|                                                | CADD     | 0.646 | 0.296 |
|                                                | DANN     | 0.571 | 0.269 |
|                                                | LINSIGHT | 0.750 | 0.386 |
|                                                | phyloP   | 0.537 | 0.245 |
|                                                | DeepSea  | 0.791 | 0.548 |
| dsQTLs & eQTLs in <sup>14</sup> , E116         | FUN-LDA  | 0.793 | 0.476 |
|                                                | Eigen    | 0.717 | 0.425 |
|                                                | CADD     | 0.703 | 0.355 |
|                                                | DANN     | 0.586 | 0.283 |
|                                                | LINSIGHT | 0.736 | 0.409 |
|                                                | phyloP   | 0.541 | 0.231 |
|                                                | DeepSea  | 0.805 | 0.564 |



TABLE S13. Grouping of Roadmap tissues into 10 tissue types.

| Epigenome.ID | Type              | Epigenome.ID | Type              |
|--------------|-------------------|--------------|-------------------|
| E022         | Stem cell         | E117         | Connective tissue |
| E007         | Stem cell         | E028         | Connective tissue |
| E004         | Stem cell         | E057         | Connective tissue |
| E002         | Stem cell         | E058         | Connective tissue |
| E021         | Stem cell         | E119         | Connective tissue |
| E009         | Stem cell         | E127         | Connective tissue |
| E010         | Stem cell         | E071         | Brain             |
| E001         | Stem cell         | E074         | Brain             |
| E015         | Stem cell         | E073         | Brain             |
| E018         | Stem cell         | E068         | Brain             |
| E016         | Stem cell         | E067         | Brain             |
| E020         | Stem cell         | E069         | Brain             |
| E014         | Stem cell         | E072         | Brain             |
| E019         | Stem cell         | E027         | Internal organs   |
| E024         | Stem cell         | E059         | Internal organs   |
| E008         | Stem cell         | E061         | Internal organs   |
| E003         | Stem cell         | E065         | Internal organs   |
| E012         | Stem cell         | E097         | Internal organs   |
| E011         | Stem cell         | E086         | Internal organs   |
| E115         | Blood             | E087         | Internal organs   |
| E123         | Blood             | E100         | Internal organs   |
| E030         | Blood             | E105         | Internal organs   |
| E029         | Blood             | E104         | Internal organs   |
| E124         | Blood             | E095         | Internal organs   |
| E035         | Blood             | E096         | Internal organs   |
| E036         | Blood             | E113         | Internal organs   |
| E051         | Blood             | E079         | Internal organs   |
| E050         | Blood             | E094         | Internal organs   |
| E034         | Blood             | E098         | Internal organs   |
| E046         | Blood             | E081         | Fetal brain       |
| E041         | Blood             | E070         | Fetal brain       |
| E047         | Blood             | E082         | Fetal brain       |
| E048         | Blood             | E054         | Fetal brain       |
| E038         | Blood             | E053         | Fetal brain       |
| E045         | Blood             | E005         | Fetal tissue 1    |
| E044         | Blood             | E099         | Fetal tissue 1    |
| E043         | Blood             | E013         | Fetal tissue 1    |
| E039         | Blood             | E006         | Fetal tissue 1    |
| E042         | Blood             | E083         | Fetal tissue 1    |
| E040         | Blood             | E108         | Muscle            |
| E037         | Blood             | E107         | Muscle            |
| E112         | Blood             | E063         | Muscle            |
| E093         | Blood             | E078         | Muscle            |
| E062         | Blood             | E103         | Muscle            |
| E033         | Blood             | E076         | Muscle            |
| E116         | Blood             | E111         | Muscle            |
| E031         | Blood             | E091         | Fetal tissue 2    |
| E032         | Blood             | E092         | Fetal tissue 2    |
| E122         | Connective tissue | E089         | Fetal tissue 2    |
| E120         | Connective tissue | E090         | Fetal tissue 2    |
| E121         | Connective tissue | E088         | Fetal tissue 2    |
| E025         | Connective tissue | E080         | Fetal tissue 2    |
| E023         | Connective tissue | E066         | GI                |
| E049         | Connective tissue | E110         | GI                |
| E026         | Connective tissue | E109         | GI                |
| E129         | Connective tissue | E106         | GI                |
| E126         | Connective tissue | E075         | GI                |
| E052         | Connective tissue | E077         | GI                |
| E125         | Connective tissue | E101         | GI                |
| E055         | Connective tissue | E102         | GI                |
| E056         | Connective tissue | E118         | GI                |
| E017         | Connective tissue | E085         | GI                |
| E128         | Connective tissue | E084         | GI                |
| E114         | Connective tissue |              |                   |
